# Supplementary material
Source: HighWire-hosted journal article supplement (https://erj.ersjournals.com/content/55/3/1900933)

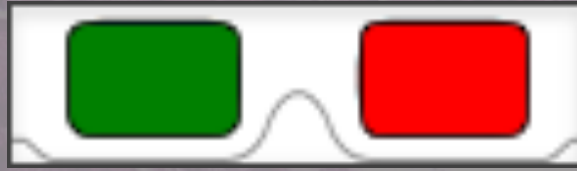

# Supplemental 3D-figures

**“Morphomolecular motifs of bronchopulmonary  
neoangiogenesis in interstitial lung diseases (ILDs)”**

***by Ackermann et al.***

**For use with red-green anaglyph glasses**

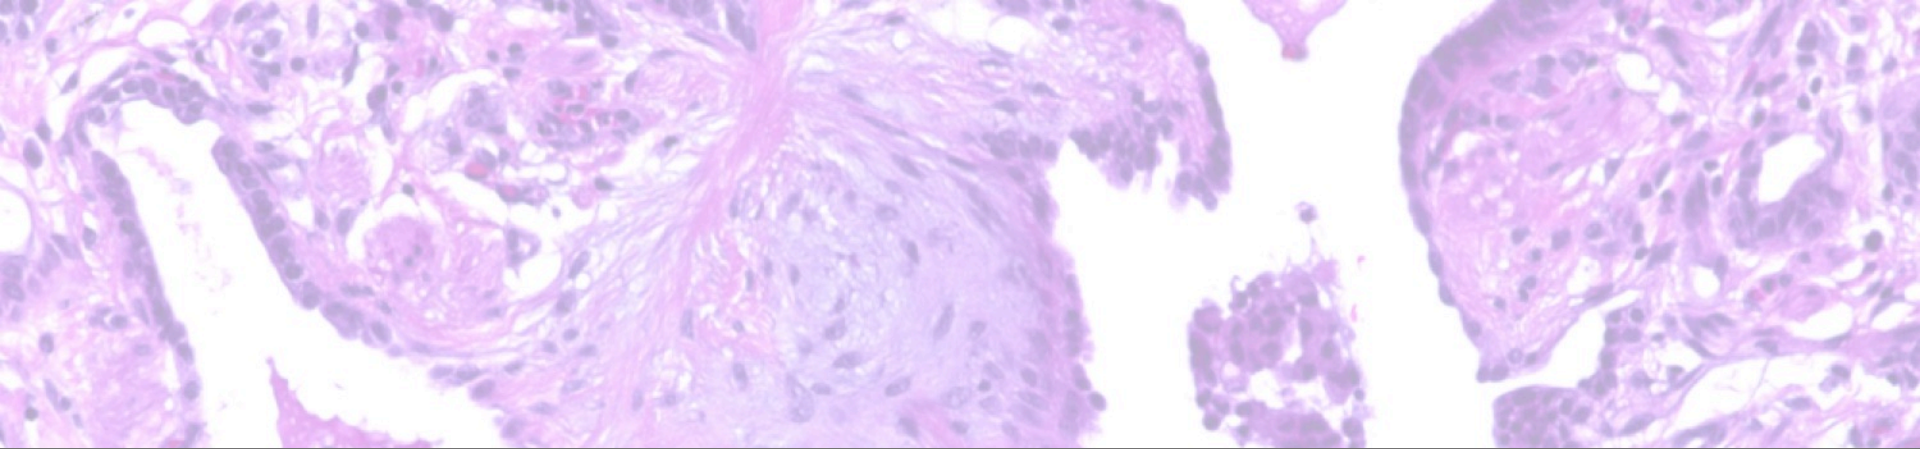

usual interstitial pneumonia (UIP)

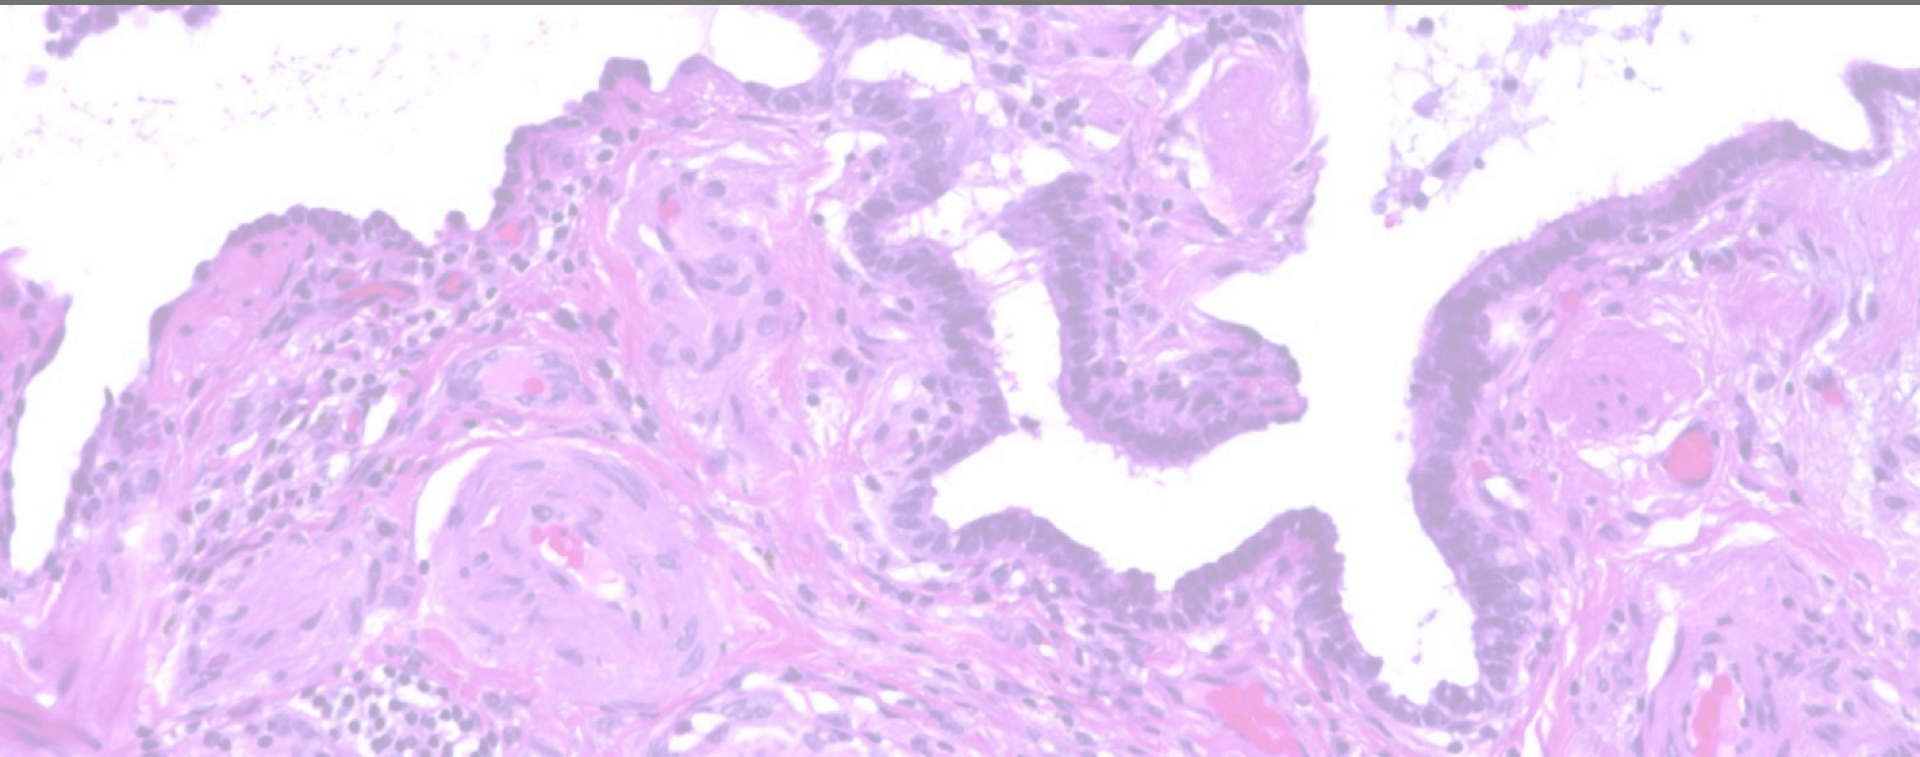

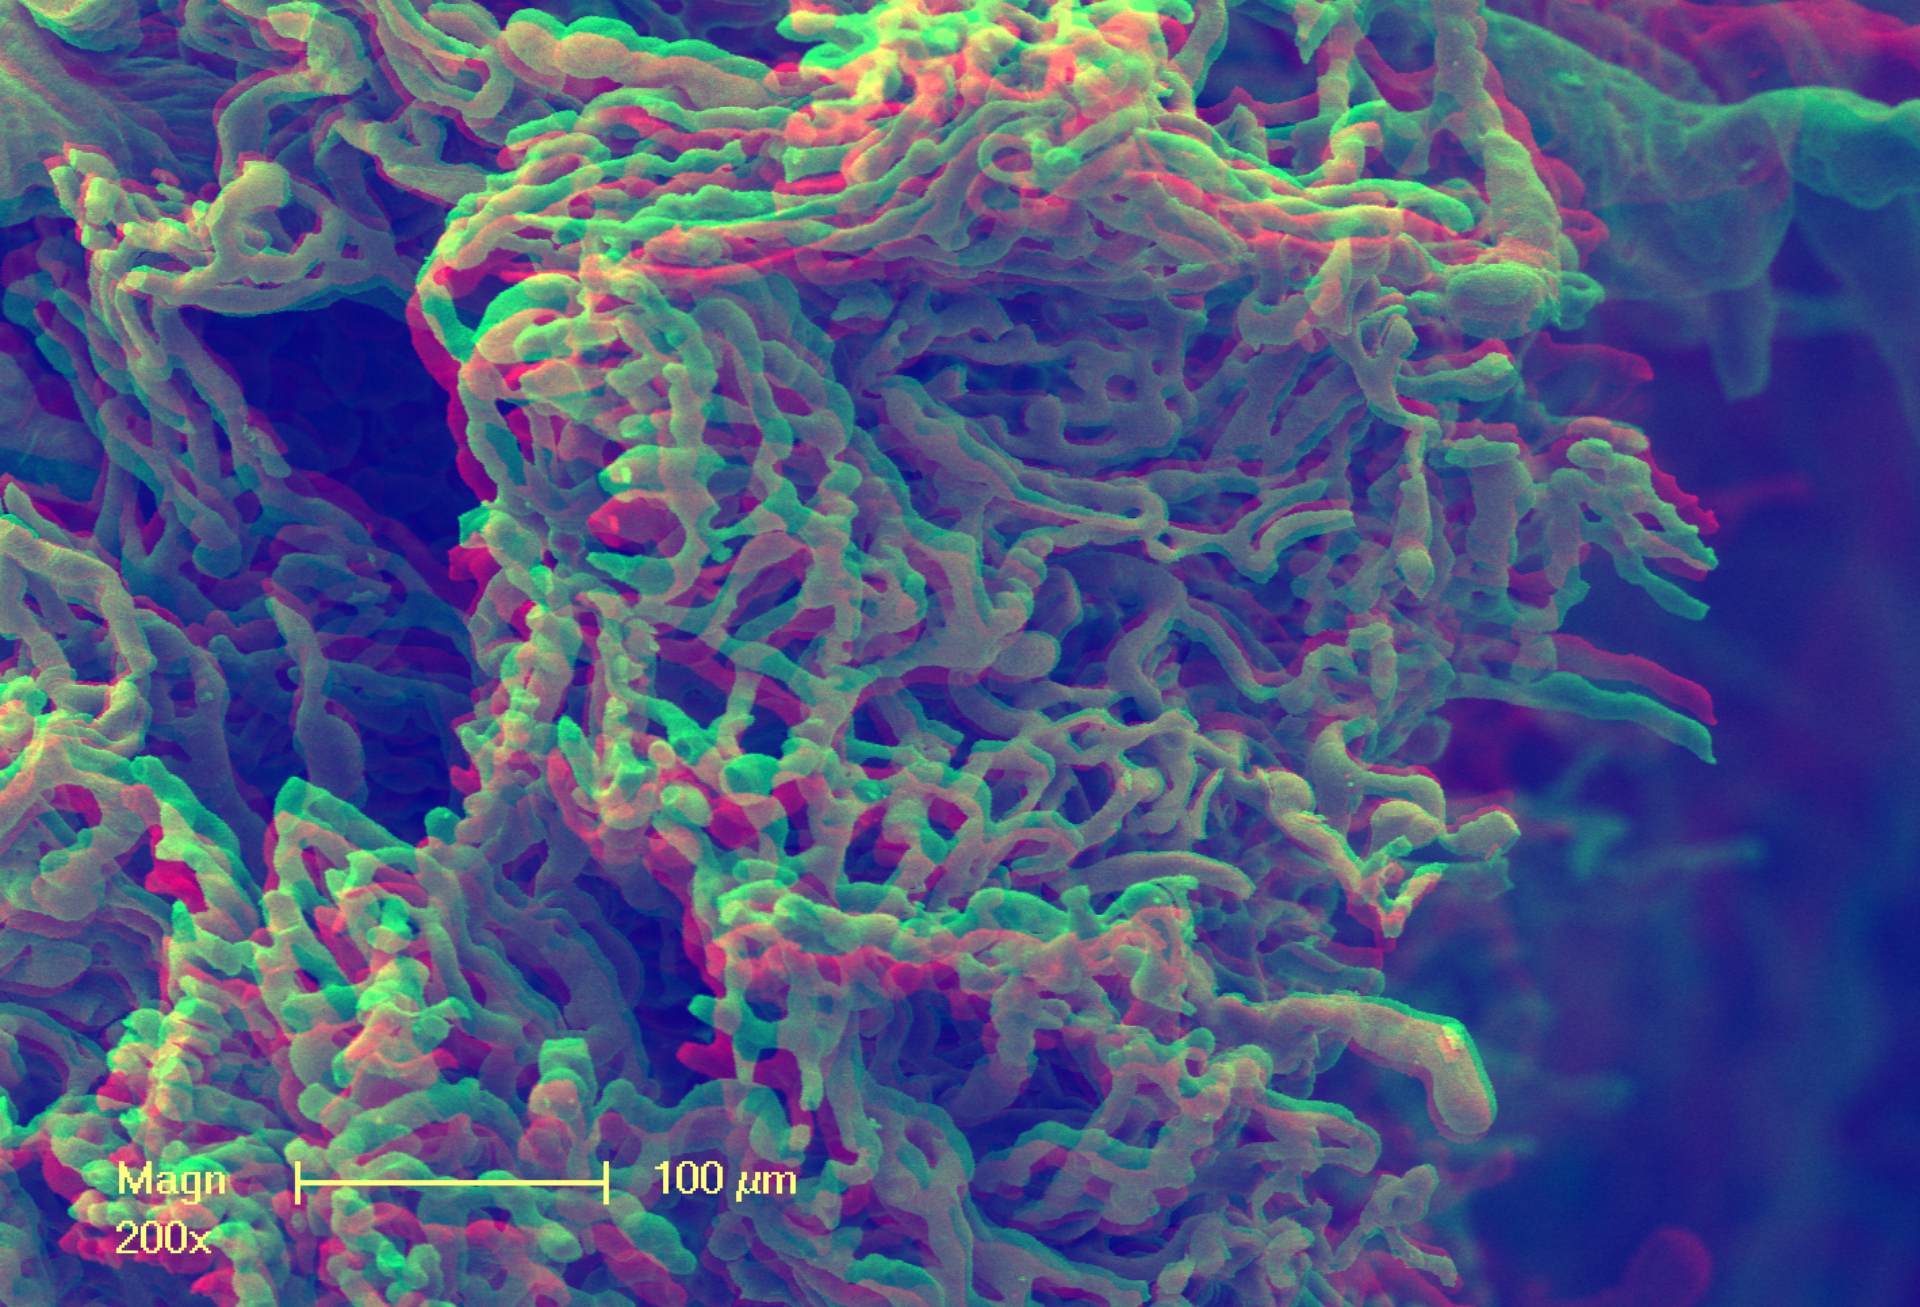

Morphomolecular motifs of bronchopulmonary neoangiogenesis in interstitial lung diseases (ILDs) by Ackermann *et al.*

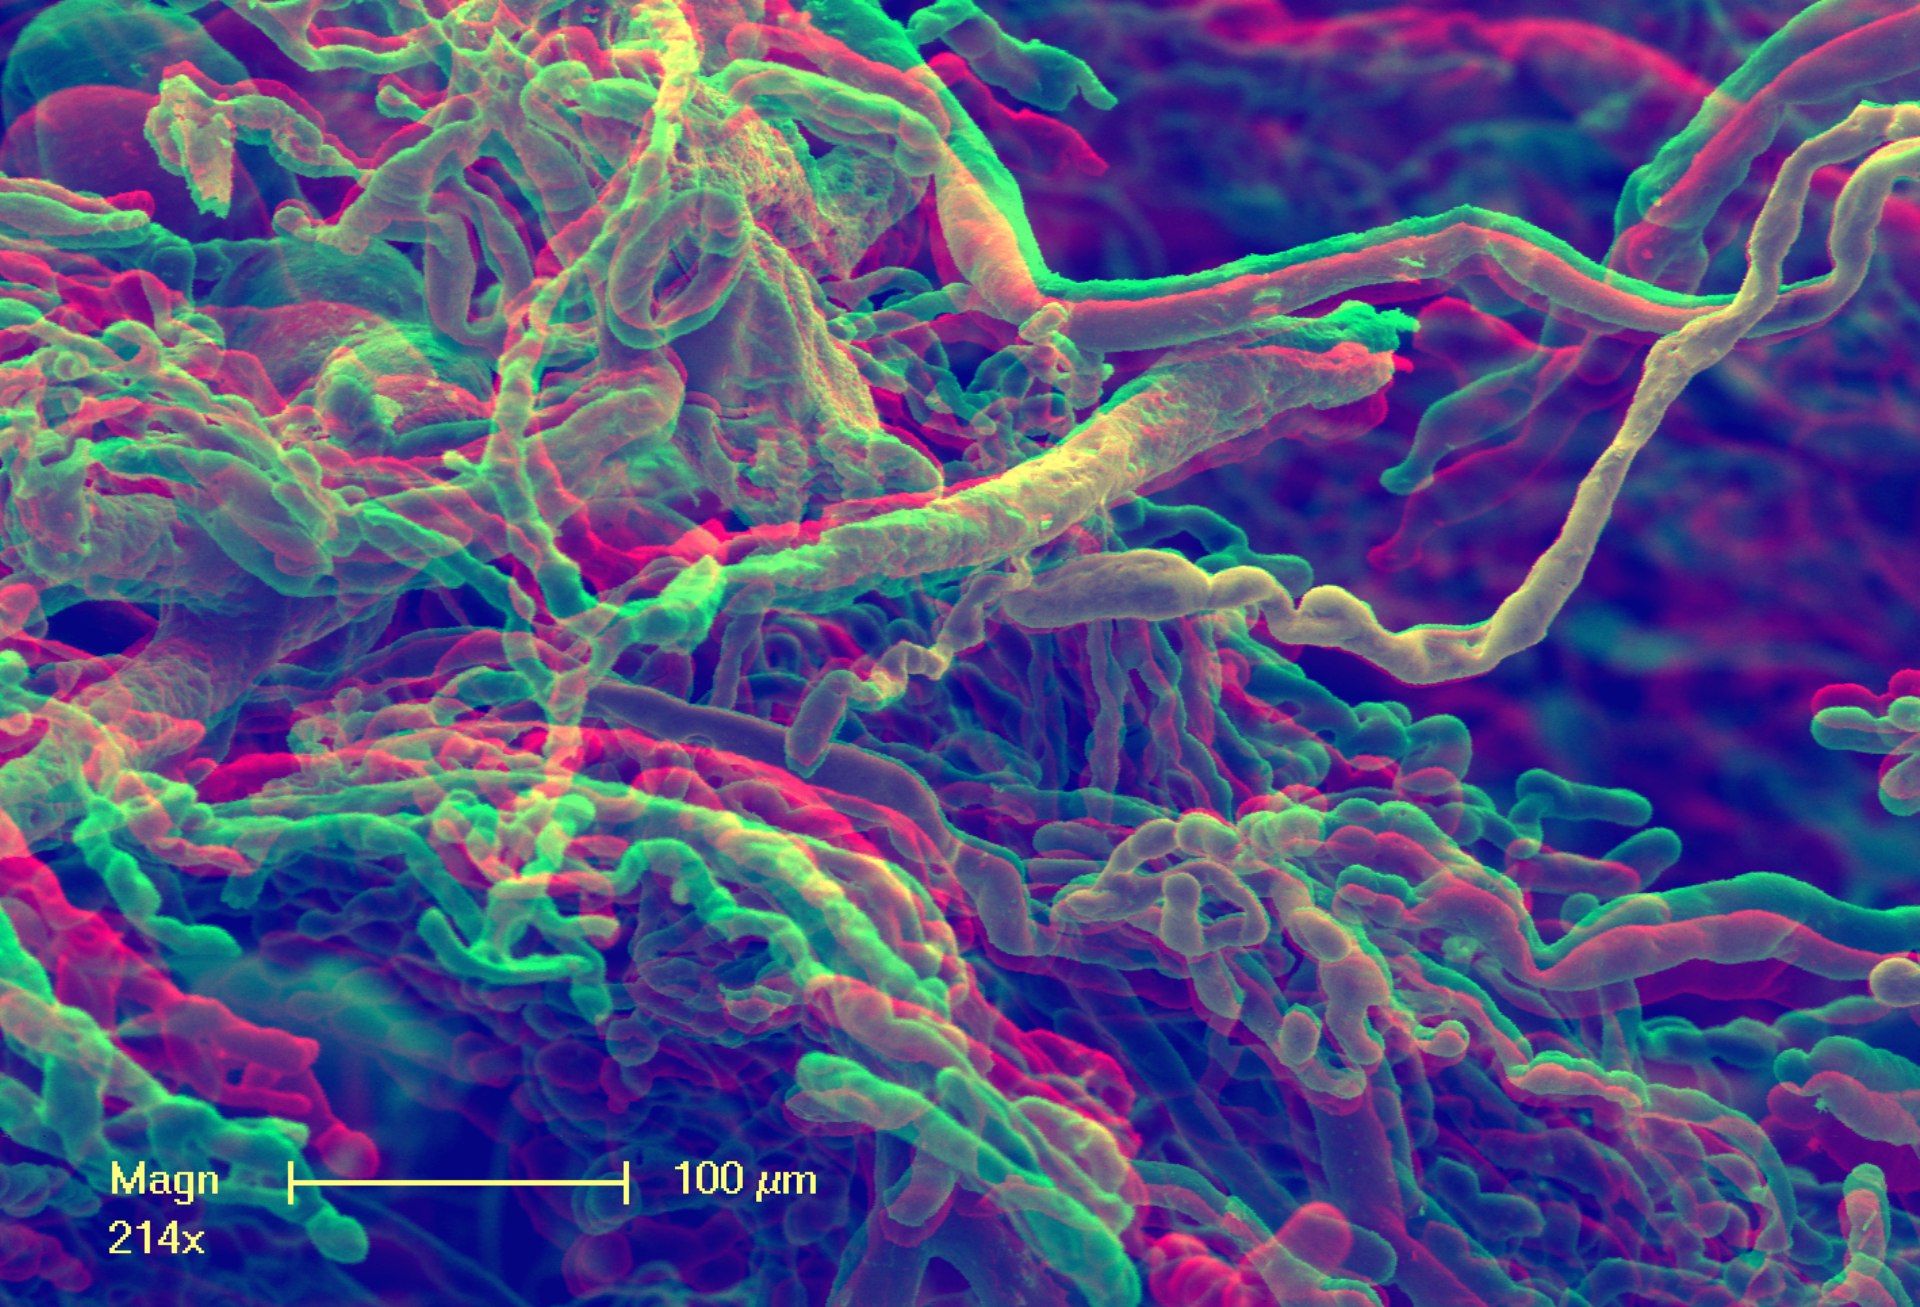

Magn 214x | 100 μm

Morphomolecular motifs of bronchopulmonary neoangiogenesis in interstitial lung diseases (ILDs) by Ackermann *et al.*

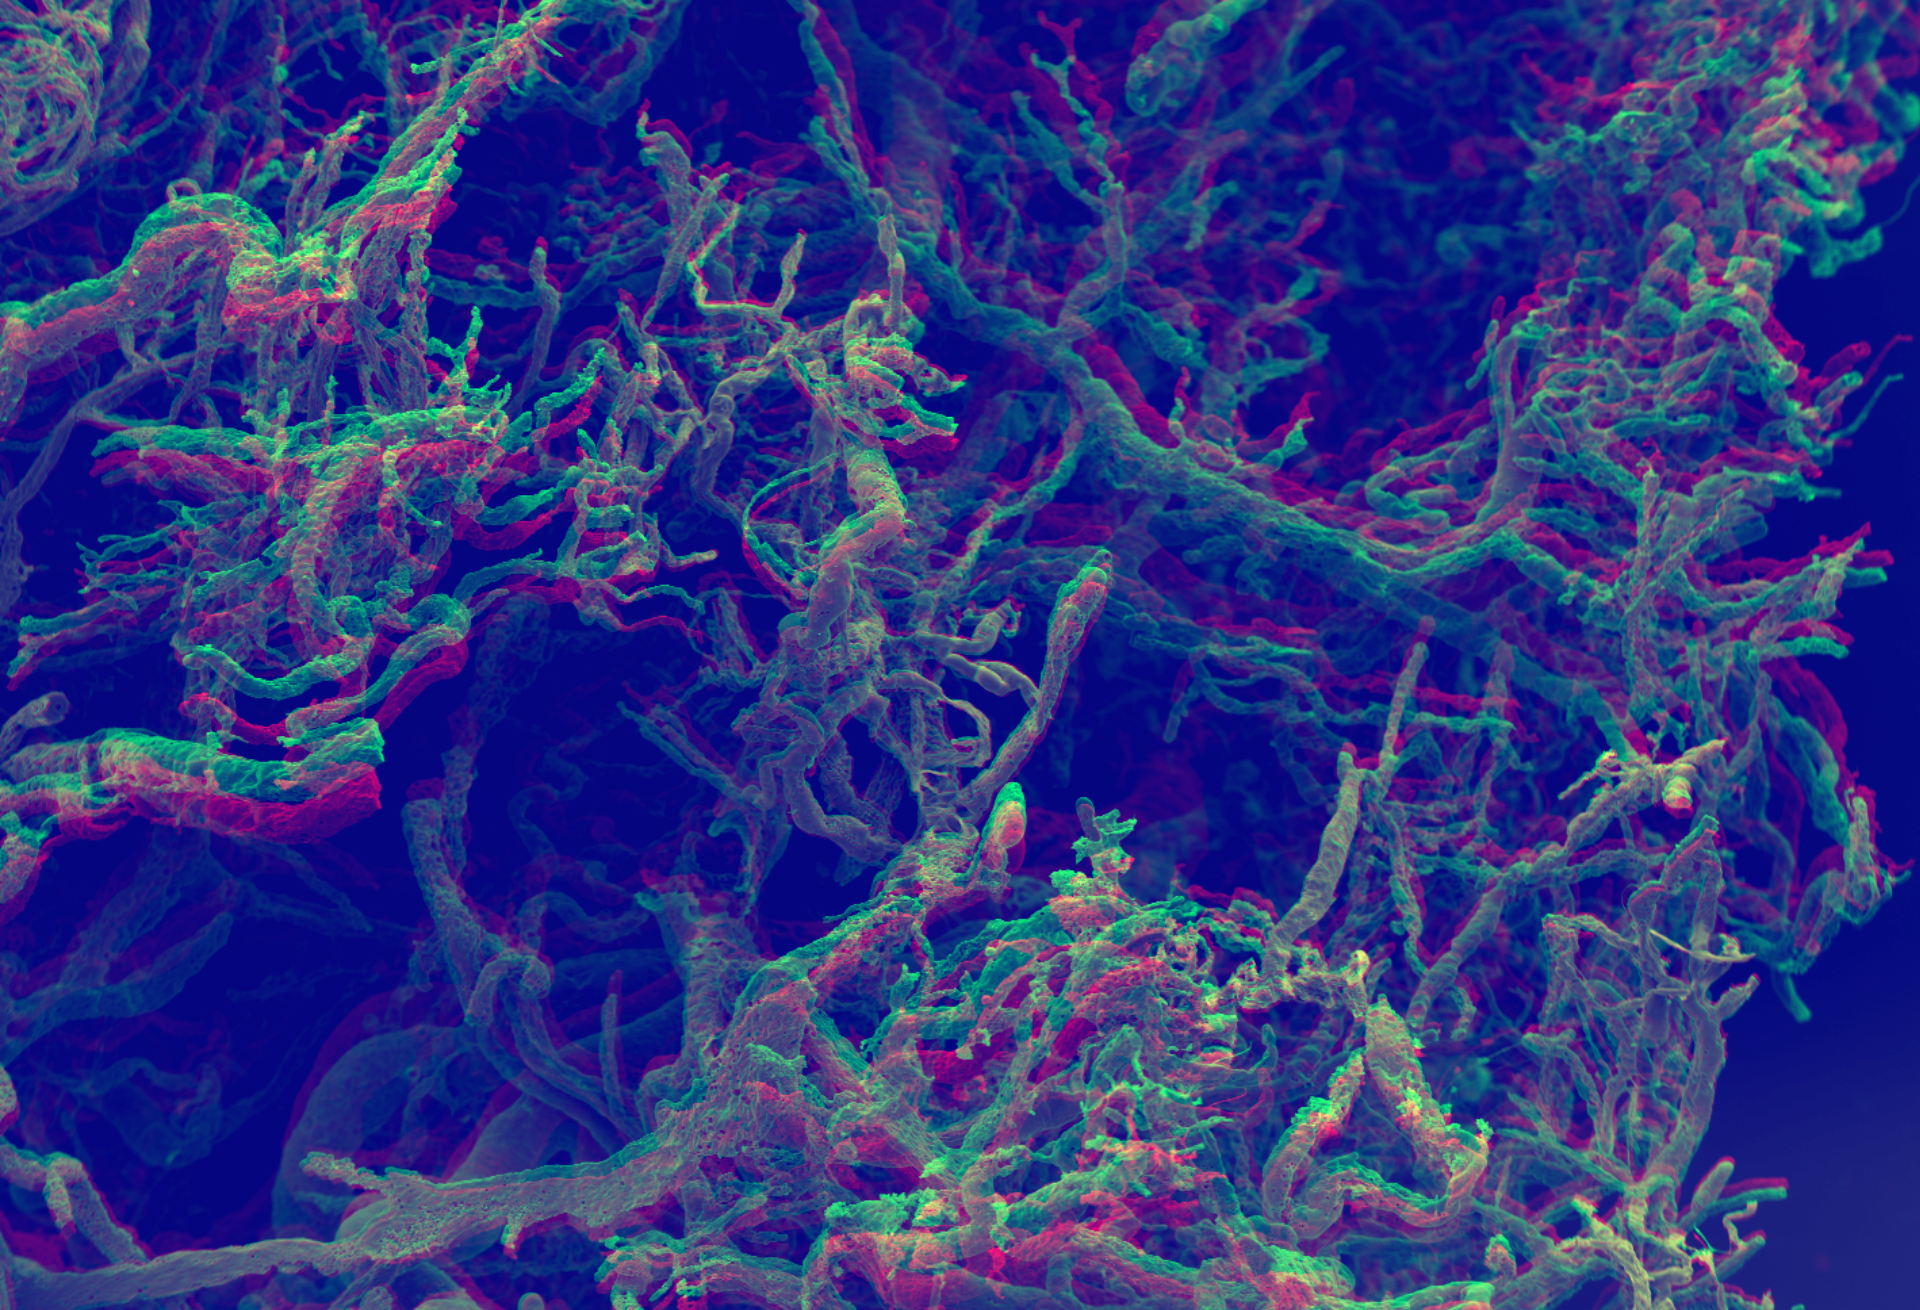

Morphomolecular motifs of bronchopulmonary neoangiogenesis in interstitial lung diseases (ILDs) by Ackermann *et al.*

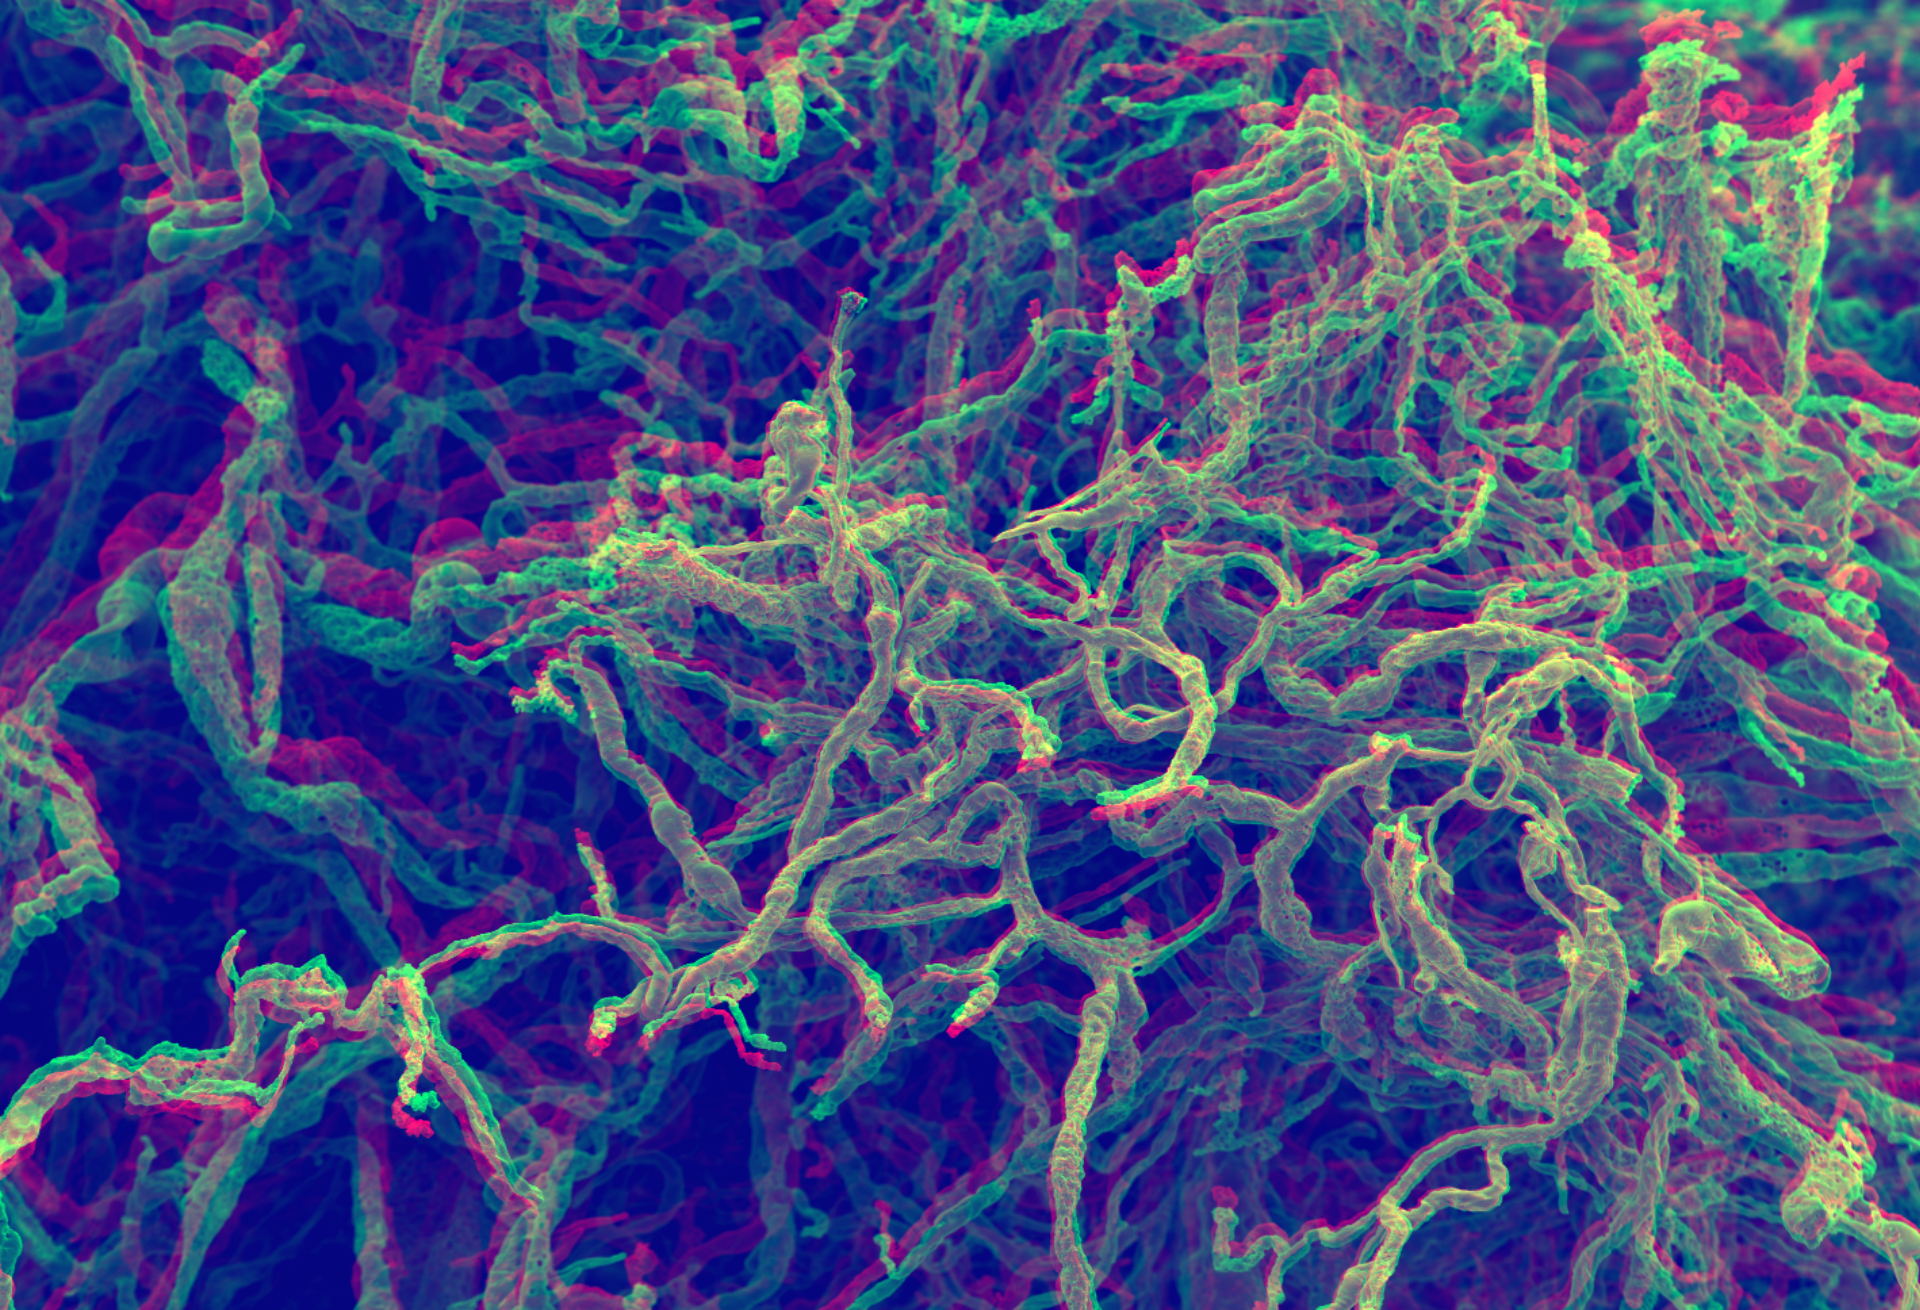

Morphomolecular motifs of bronchopulmonary neoangiogenesis in interstitial lung diseases (ILDs) by Ackermann *et al.*

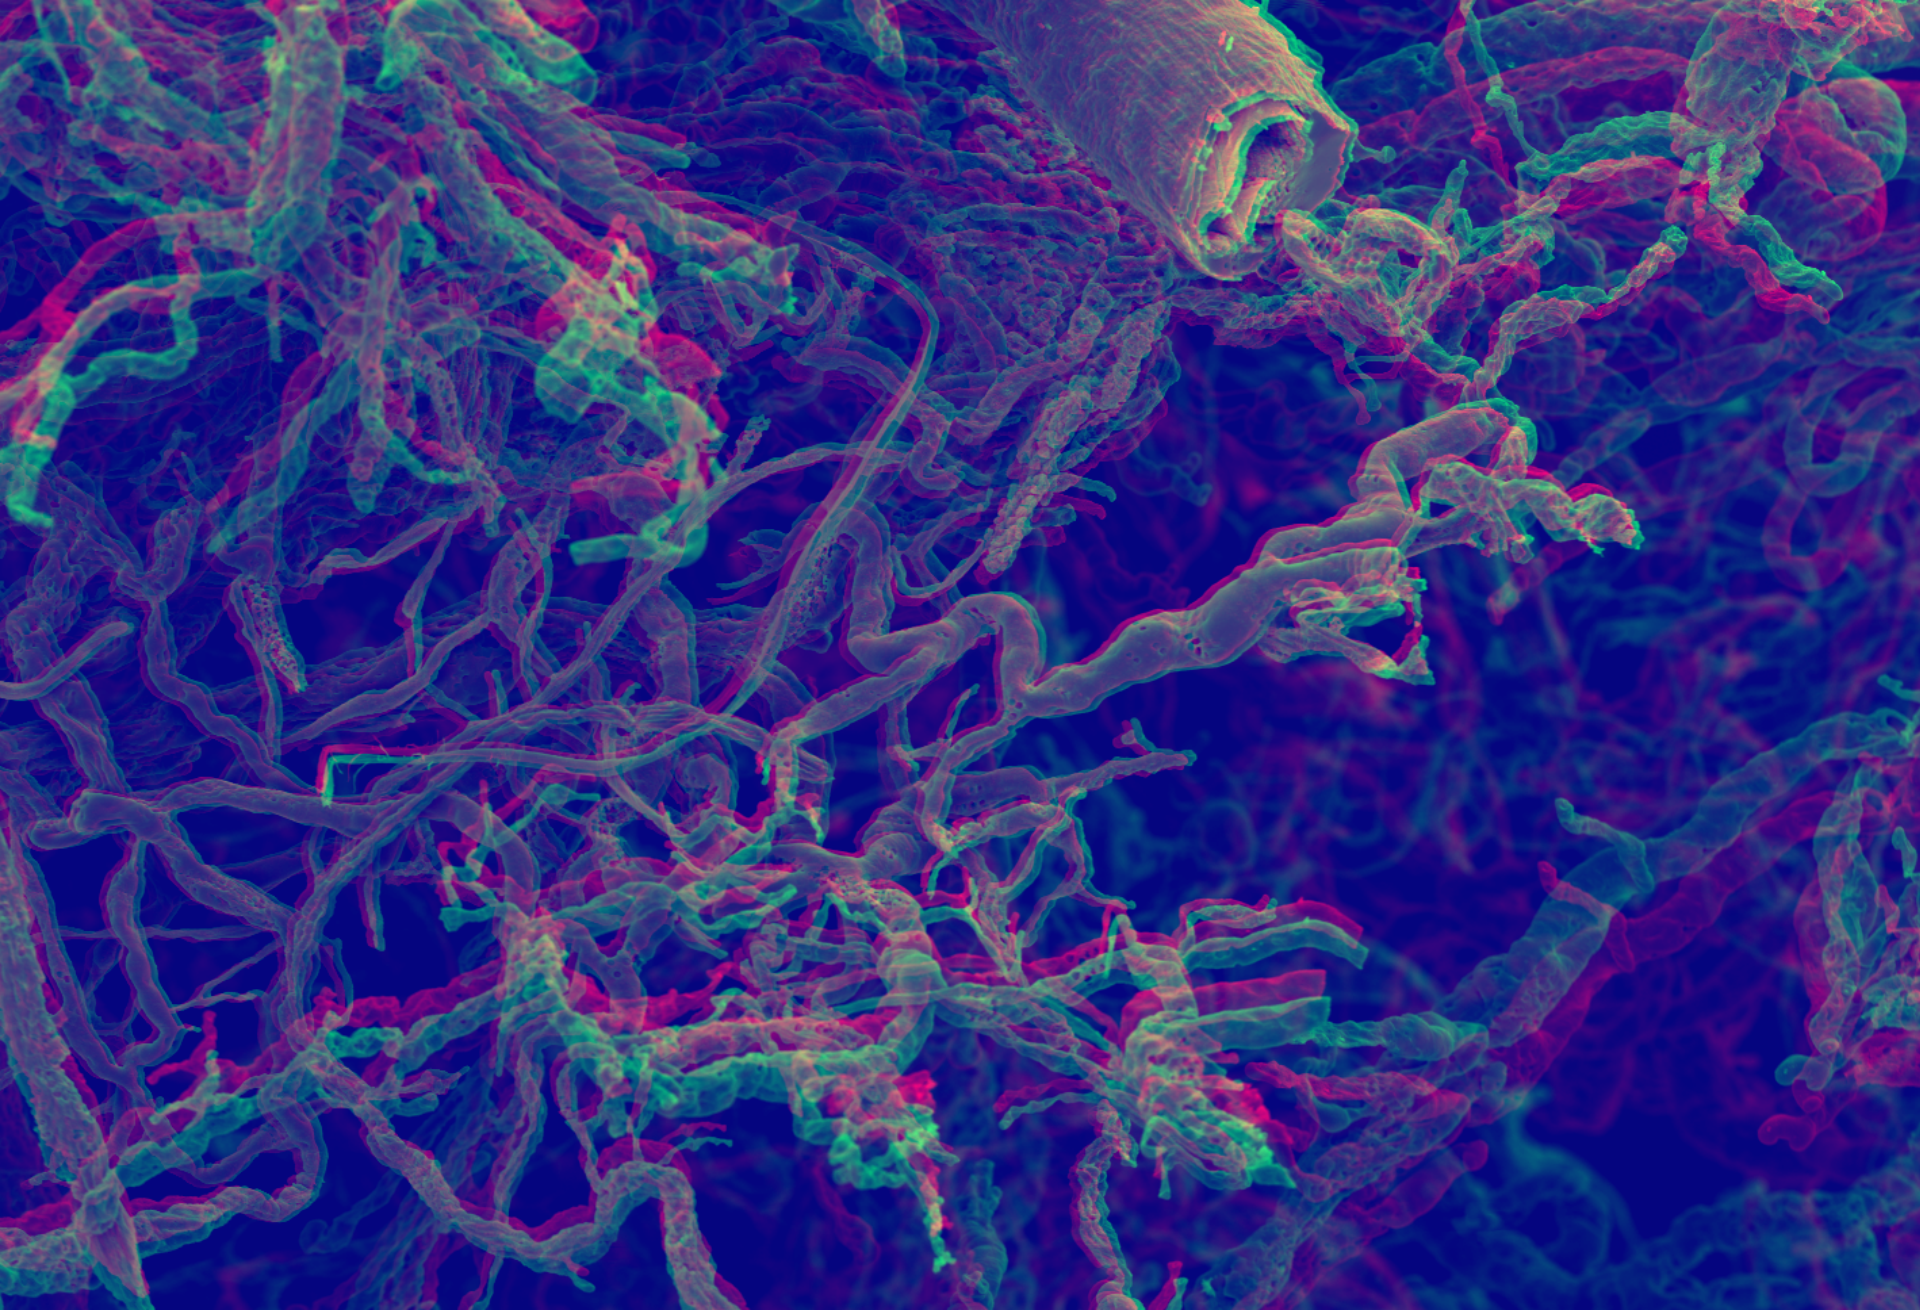

Morphomolecular motifs of bronchopulmonary neoangiogenesis in interstitial lung diseases (ILDs) by Ackermann *et al.*

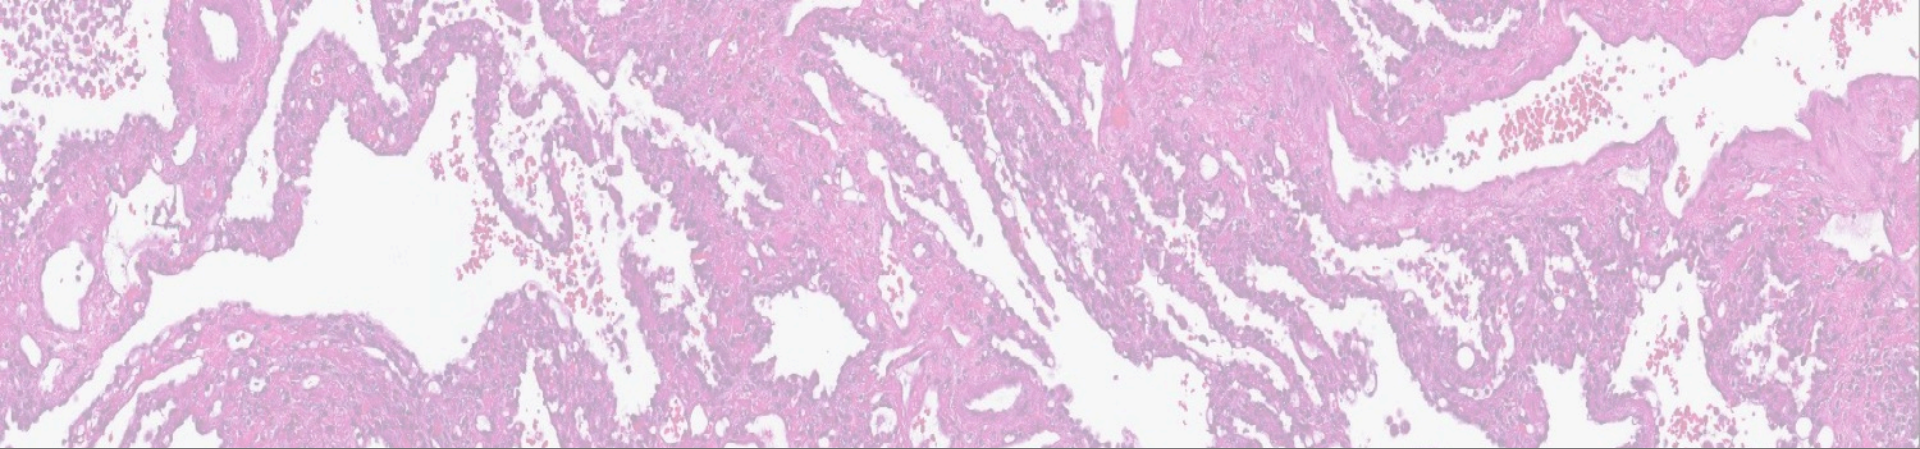

## non specific interstitial pneumonia (NSIP)

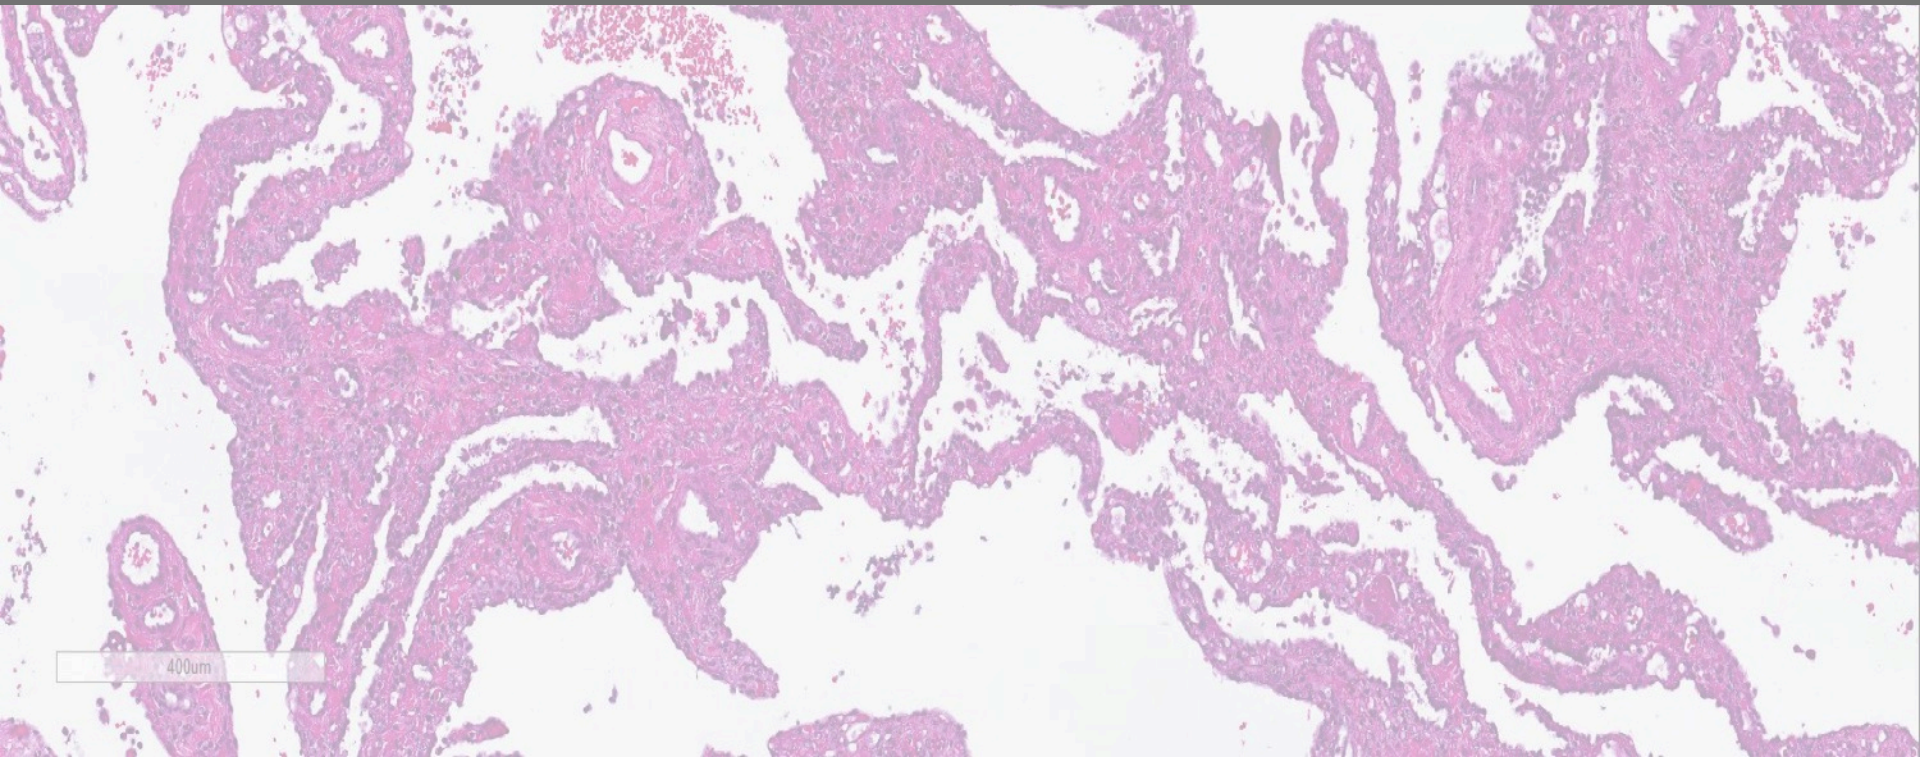

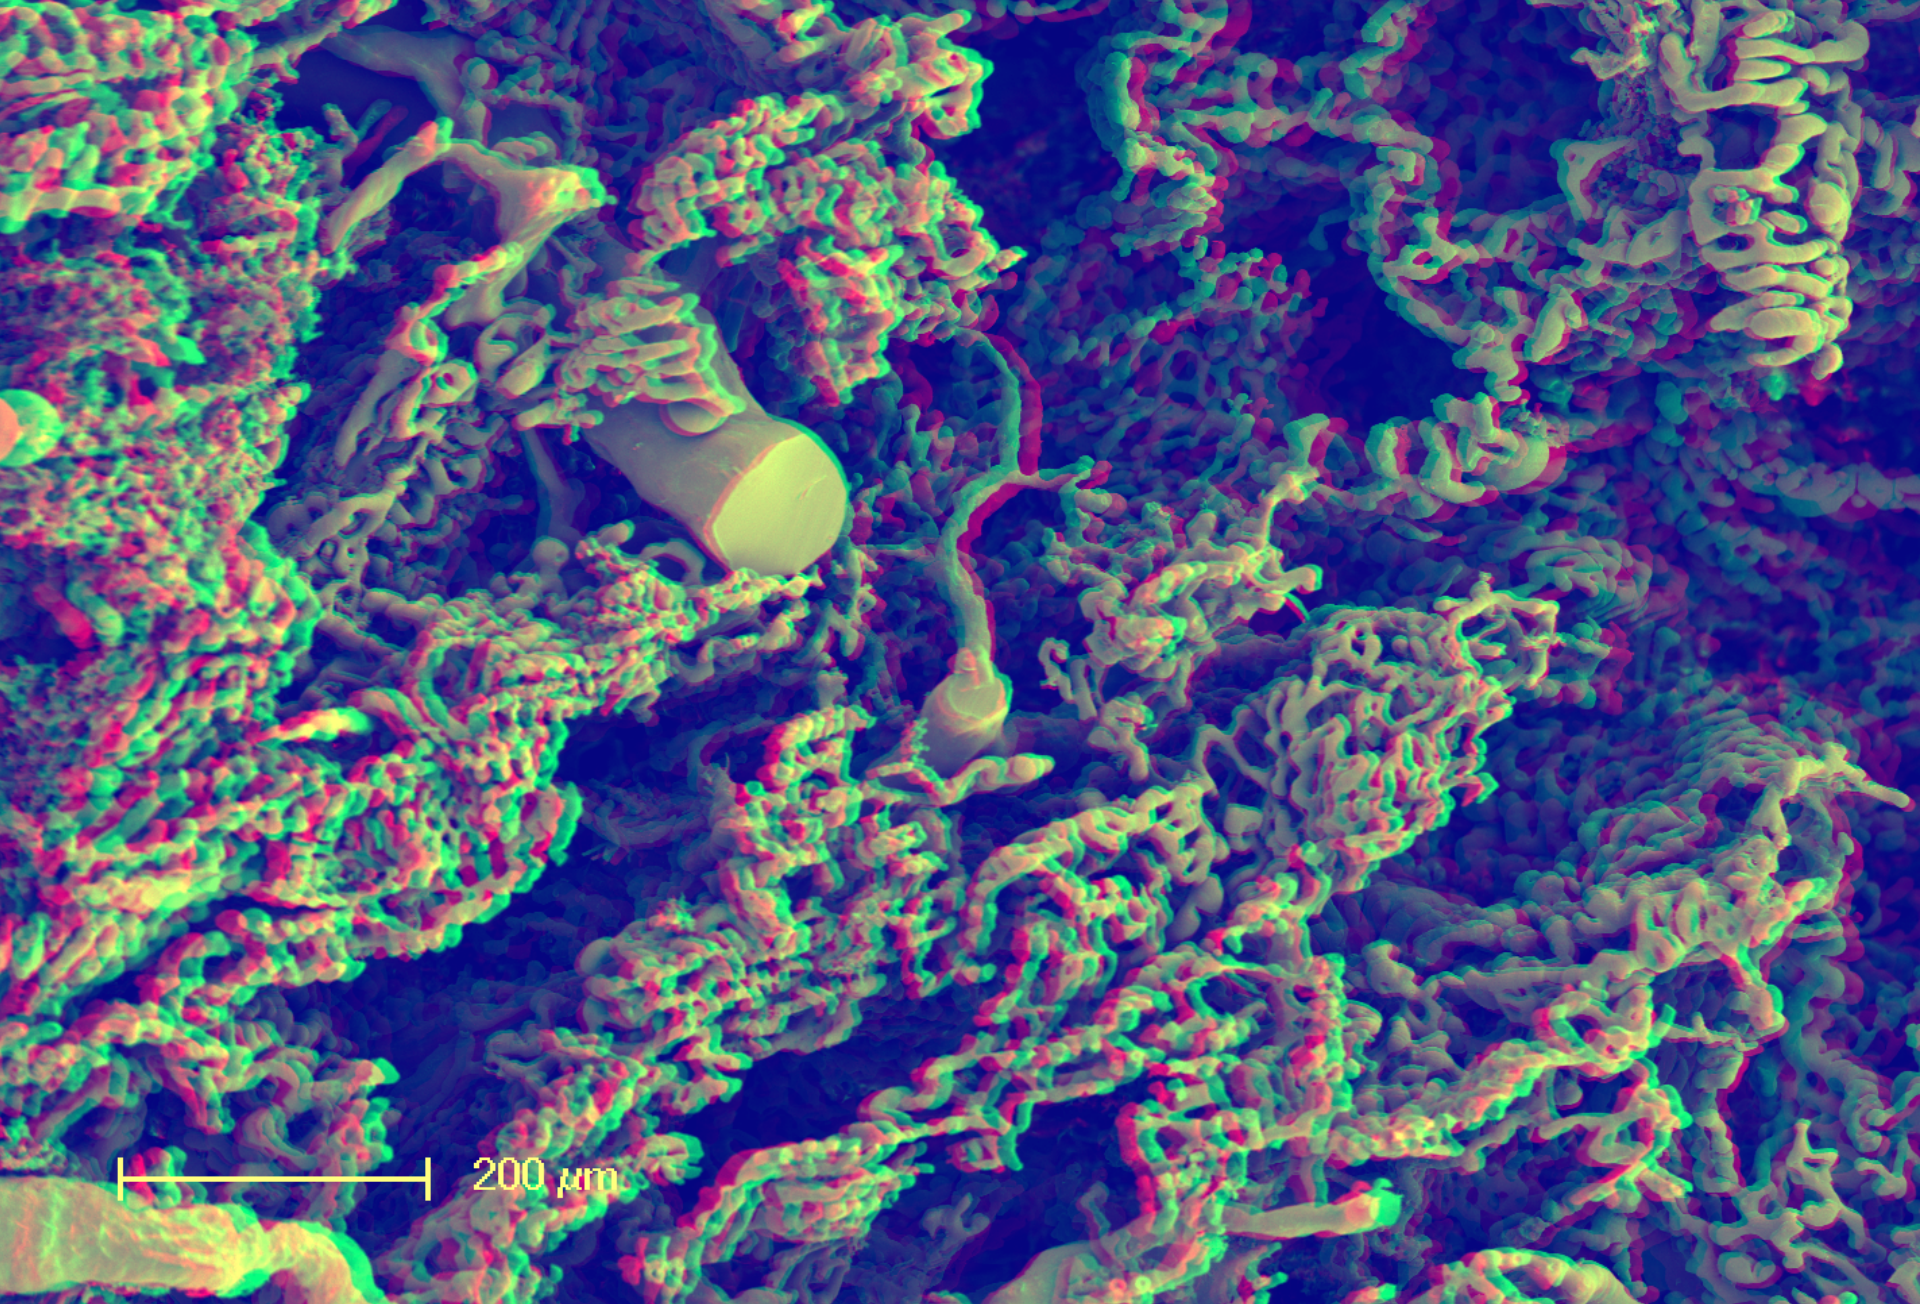

200 μm

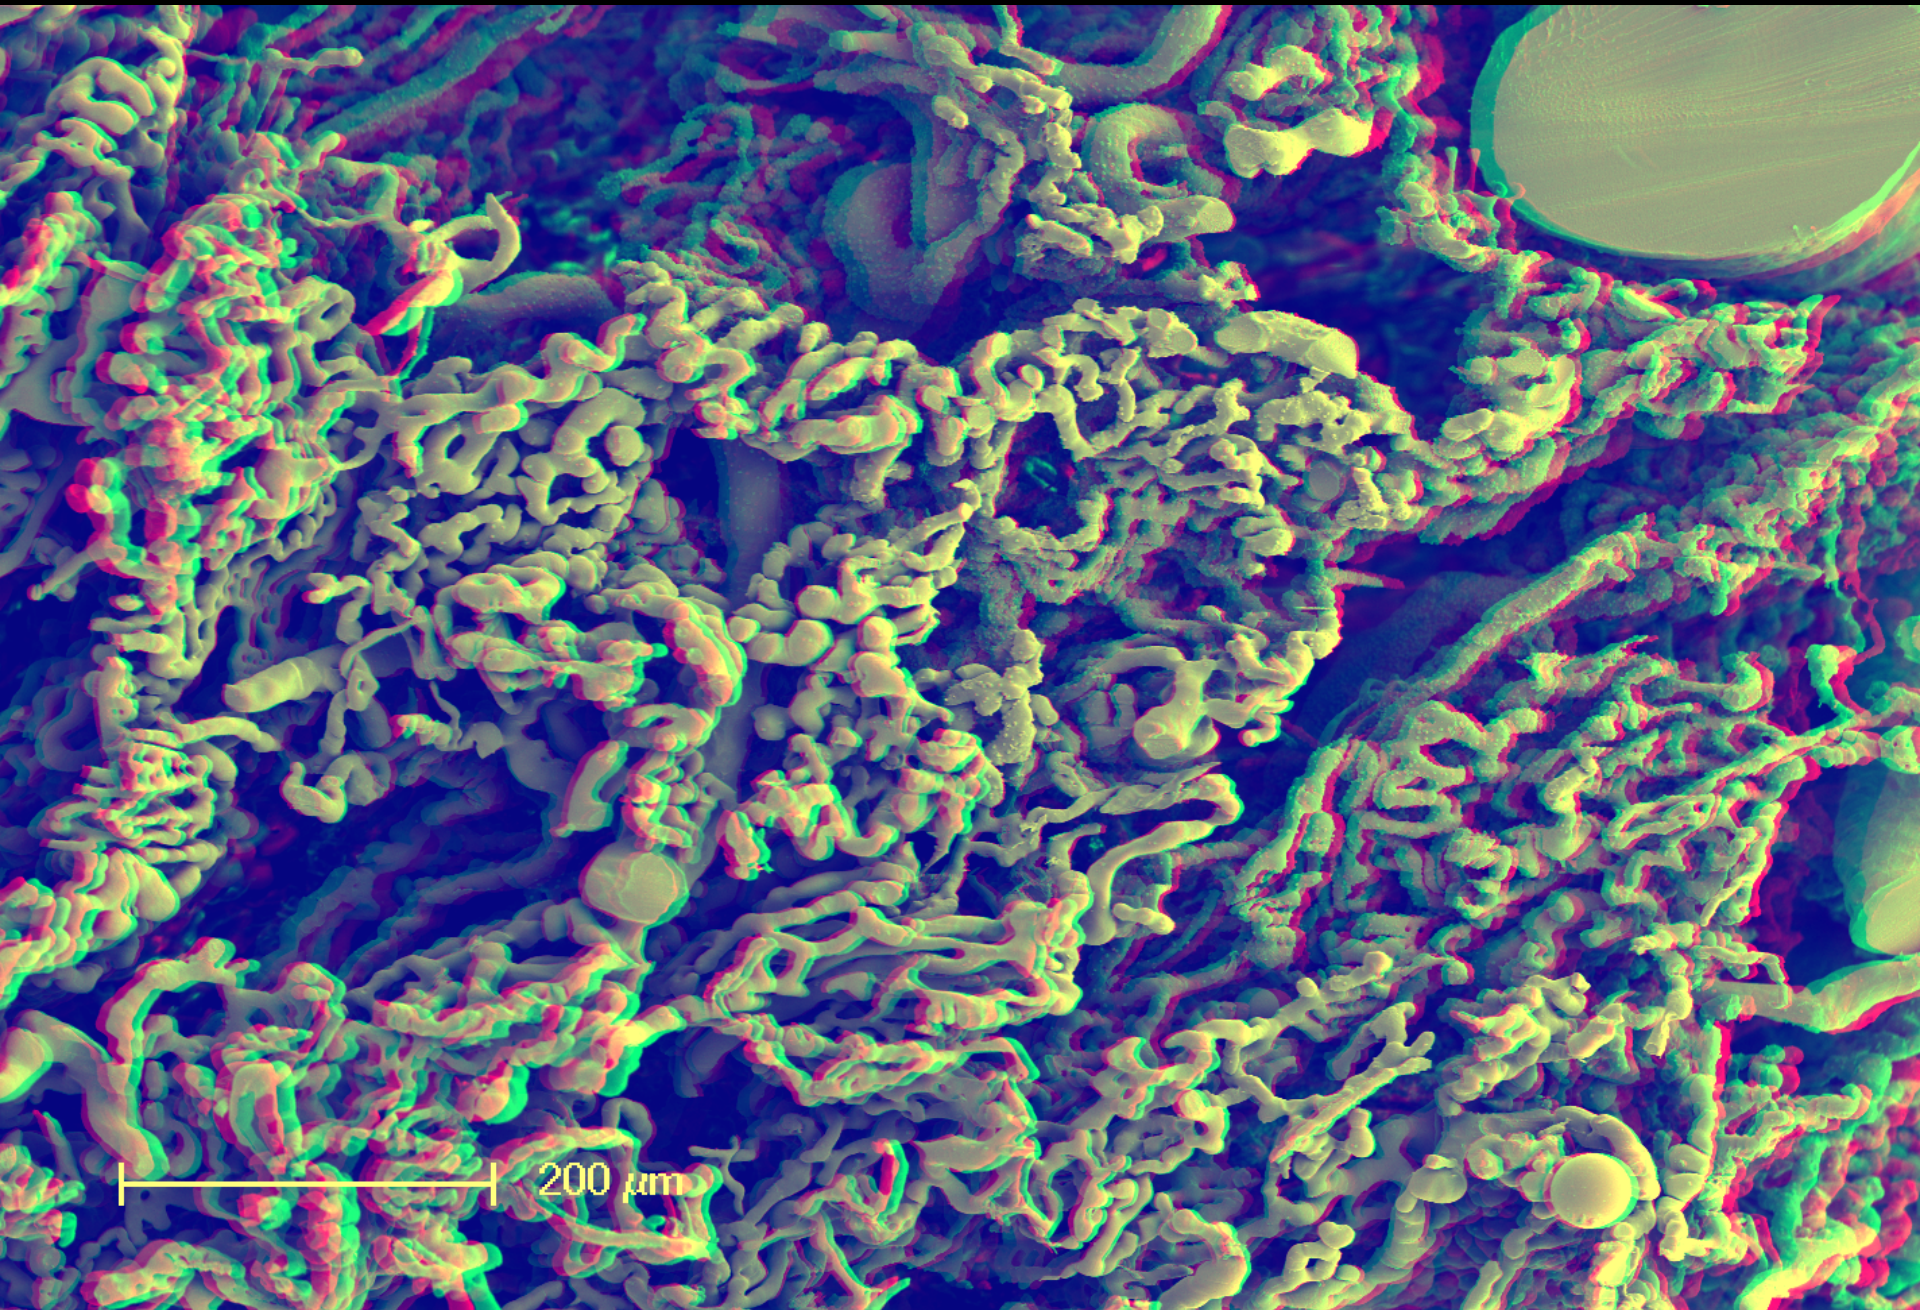

Morphomolecular motifs of bronchopulmonary neoangiogenesis in interstitial lung diseases (ILDs) by Ackermann *et al.*

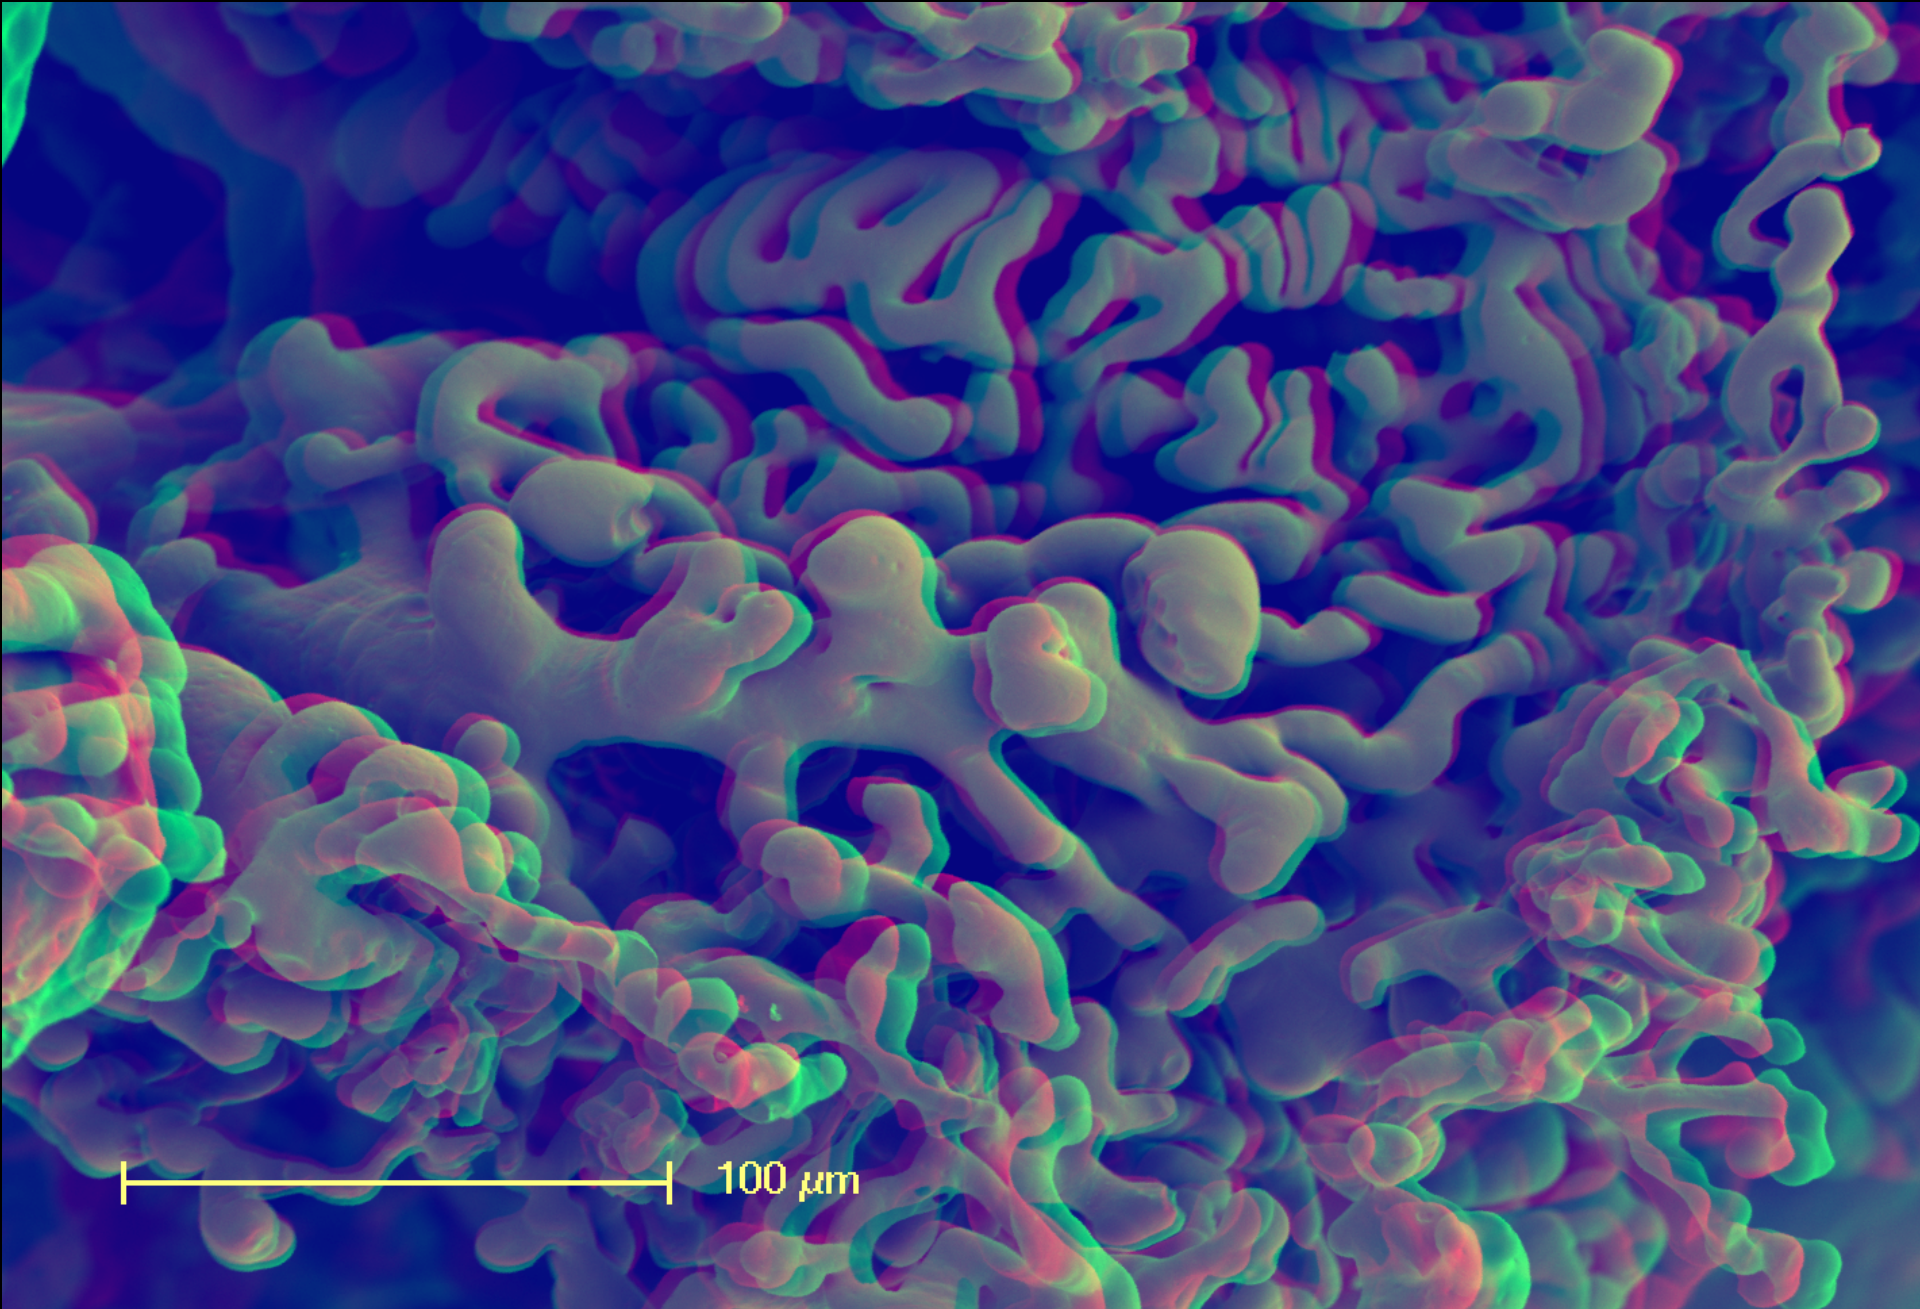

Morphomolecular motifs of bronchopulmonary neoangiogenesis in interstitial lung diseases (ILDs) by Ackermann *et al.*

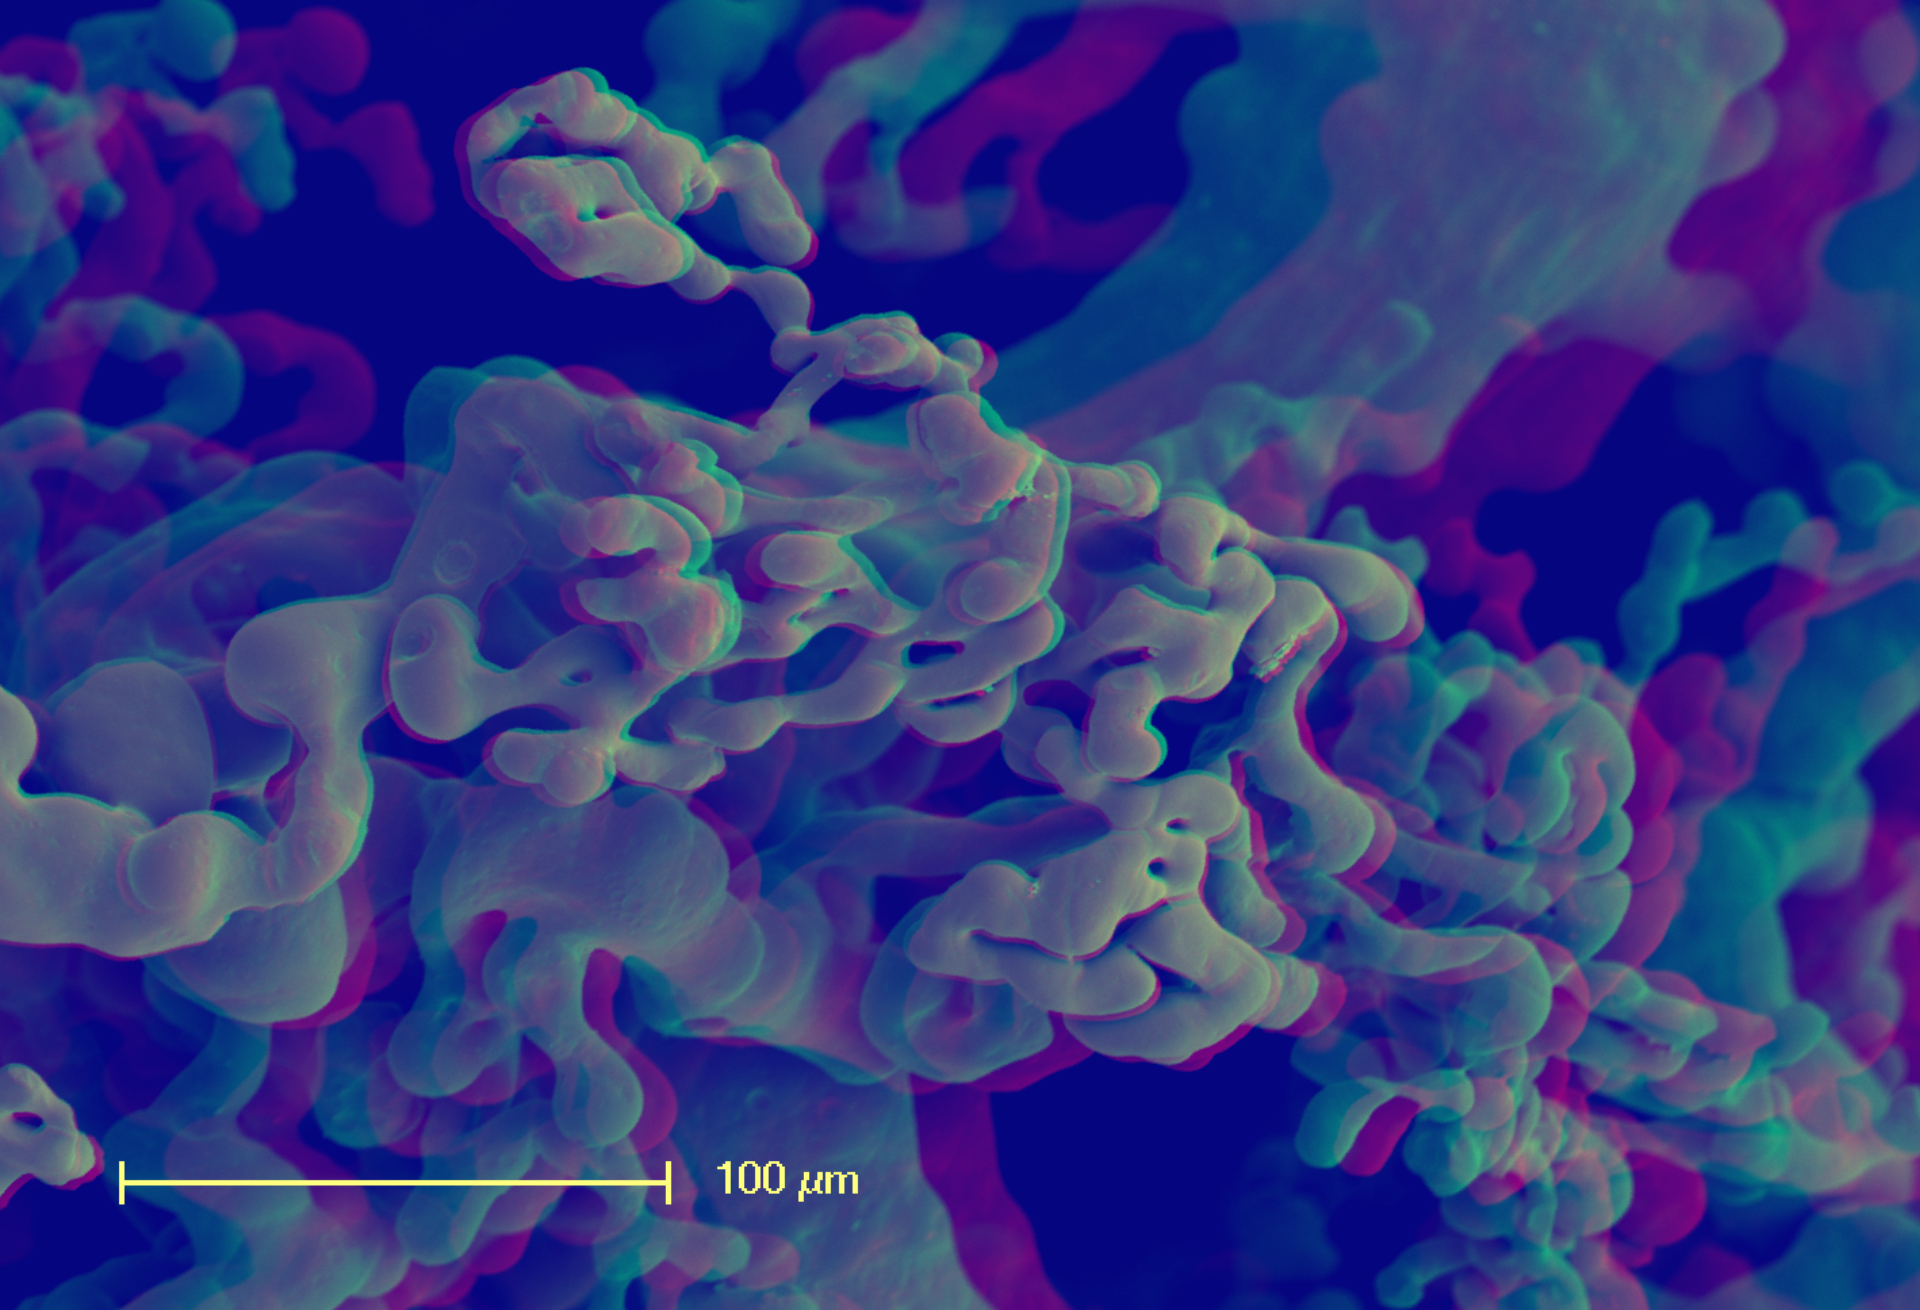

Morphomolecular motifs of bronchopulmonary neoangiogenesis in interstitial lung diseases (ILDs) by Ackermann *et al.*

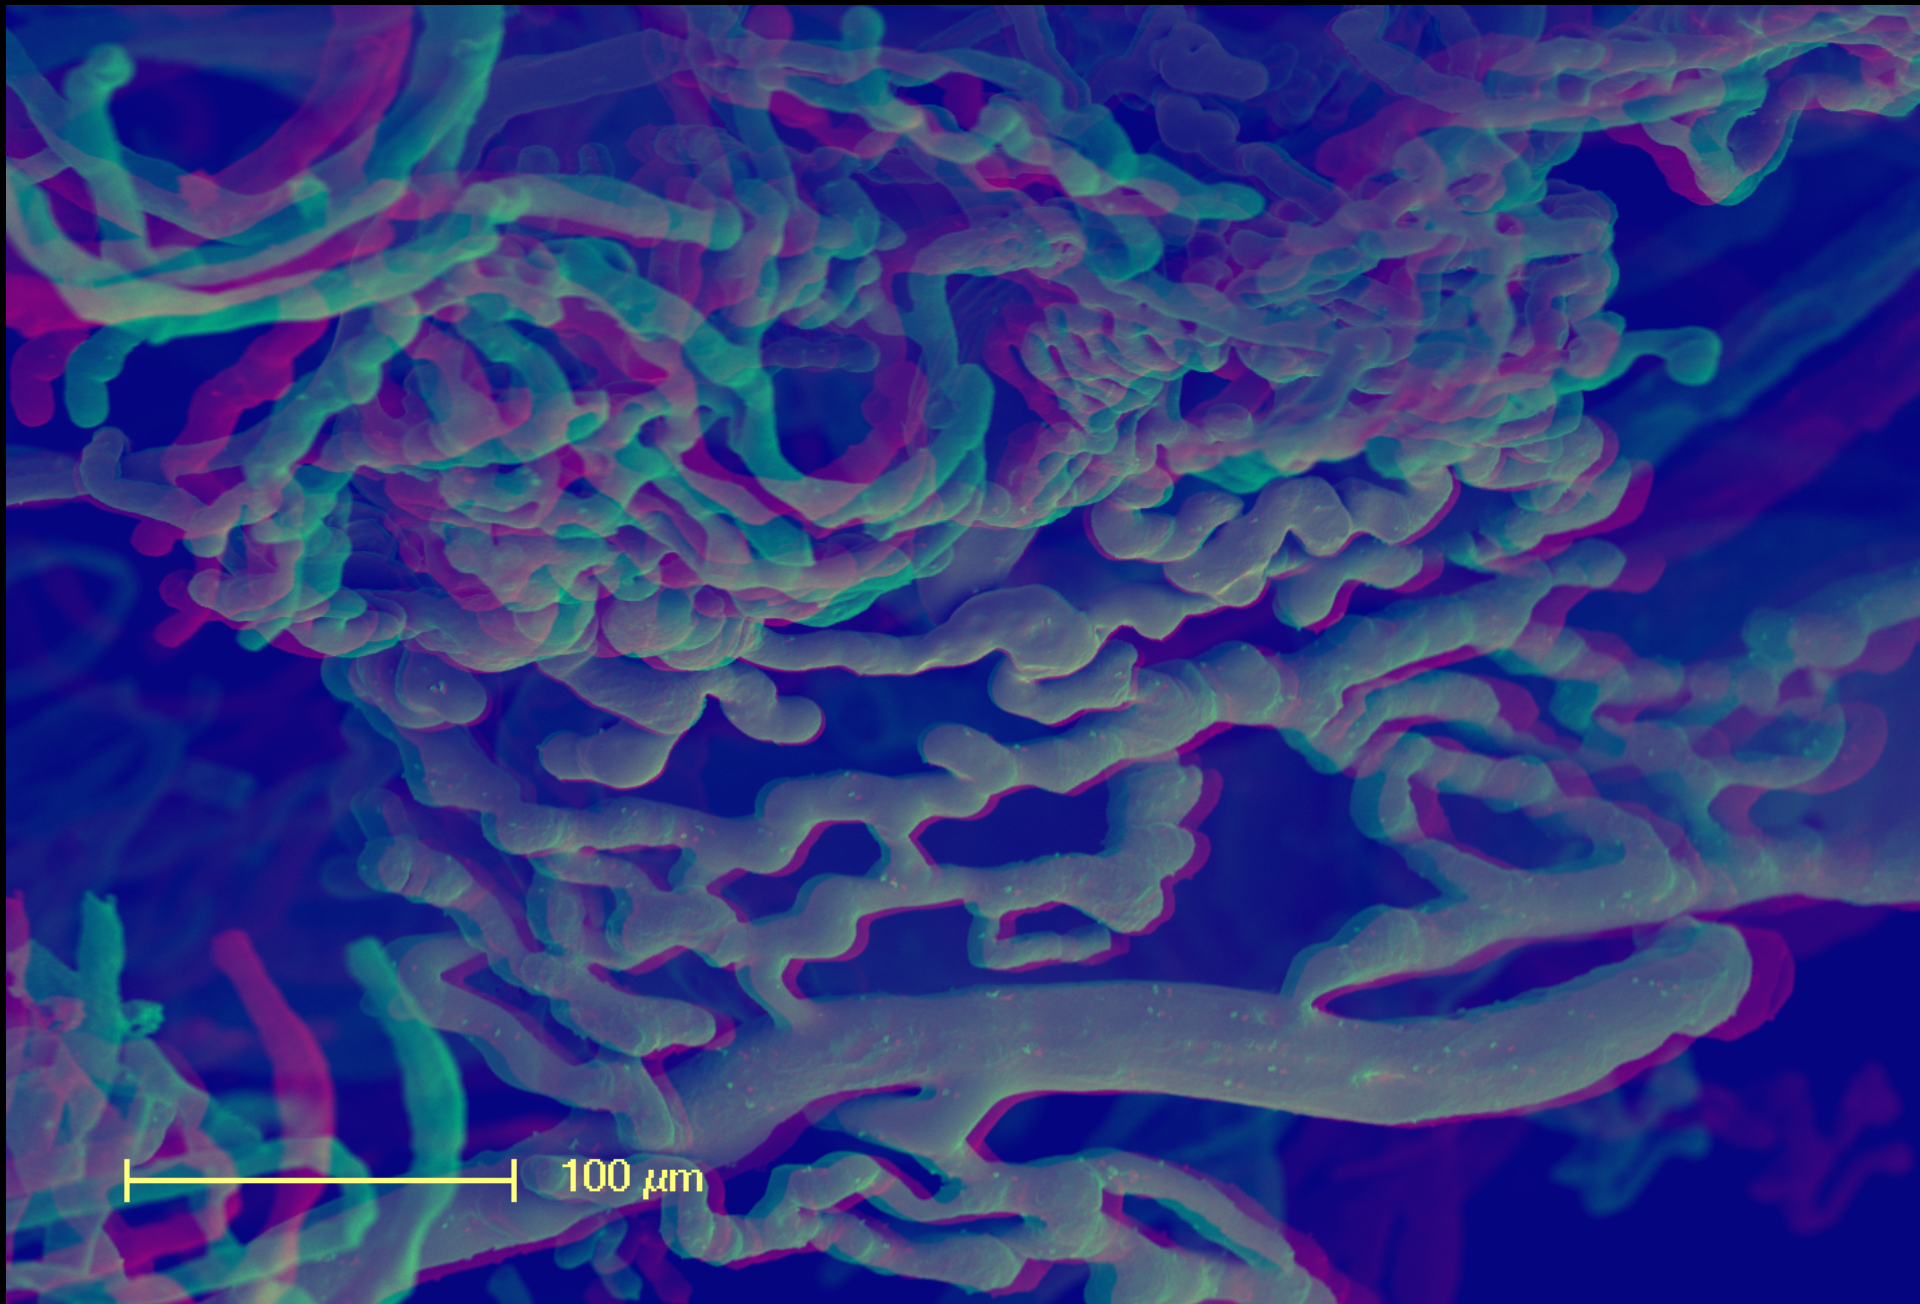

Morphomolecular motifs of bronchopulmonary neoangiogenesis in interstitial lung diseases (ILDs) by Ackermann *et al.*

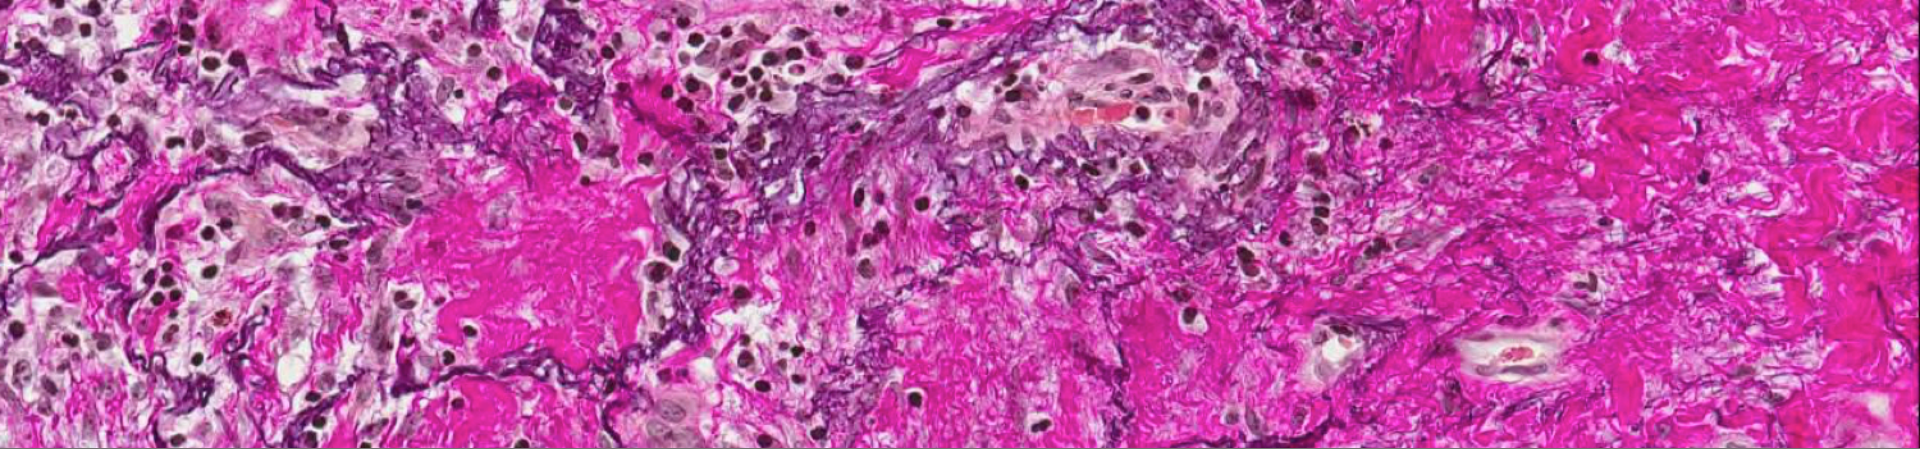

alveolar fibroelastosis (AFE)

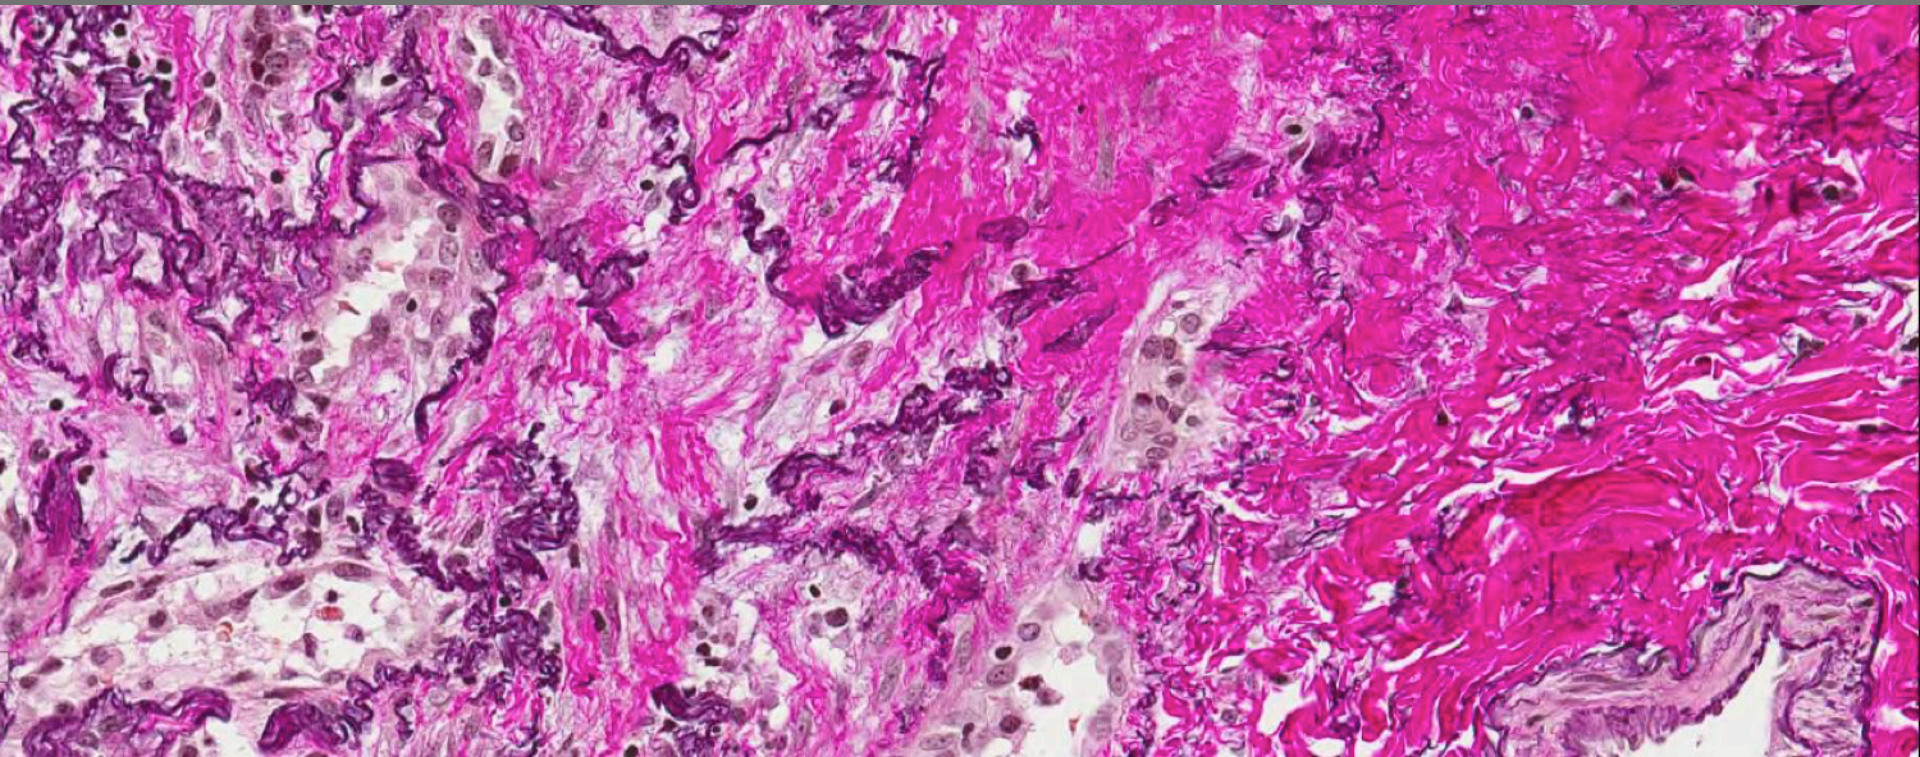

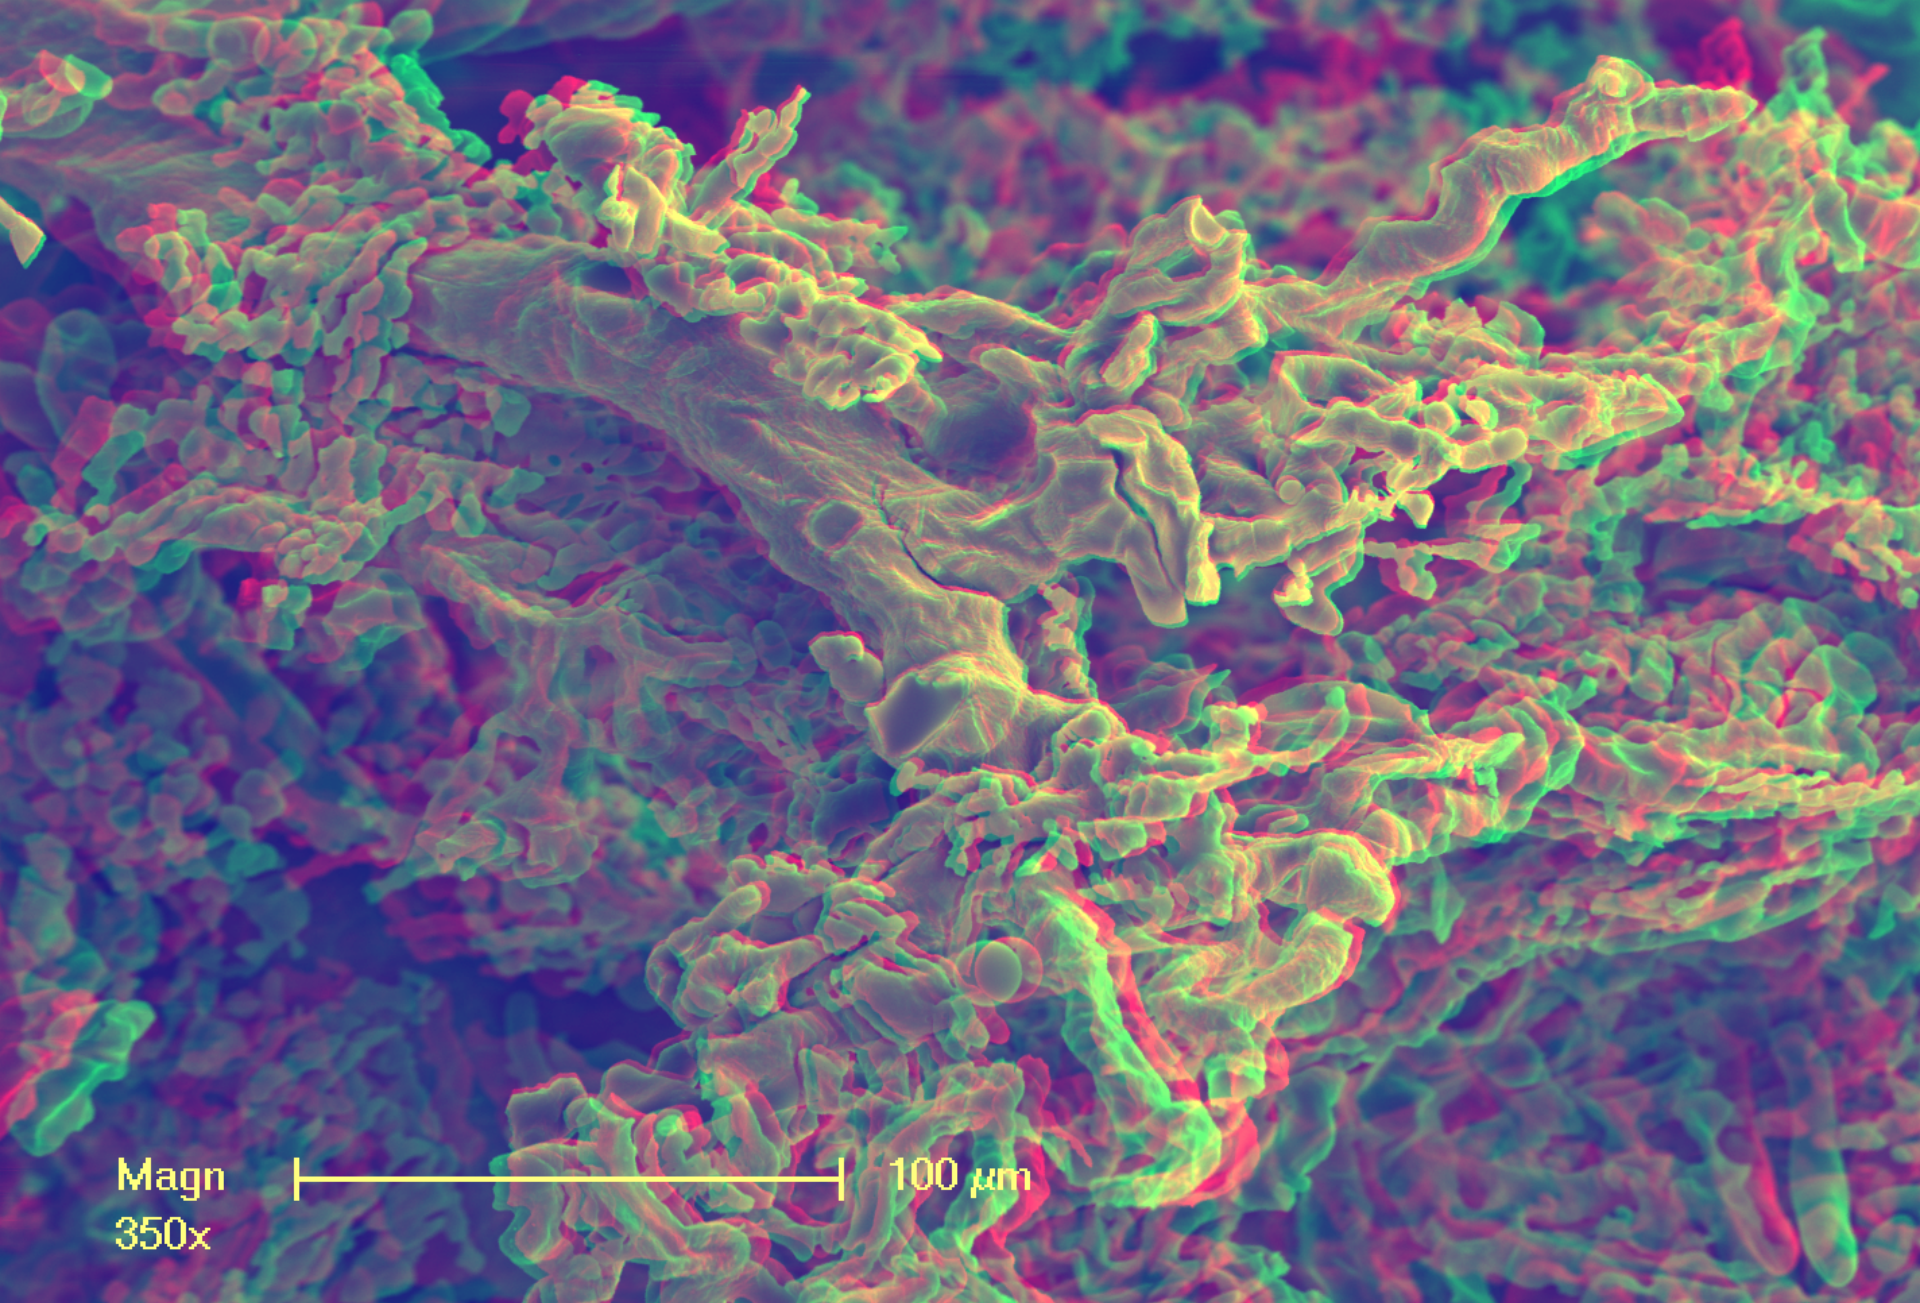

Magn  
350x

100 μm

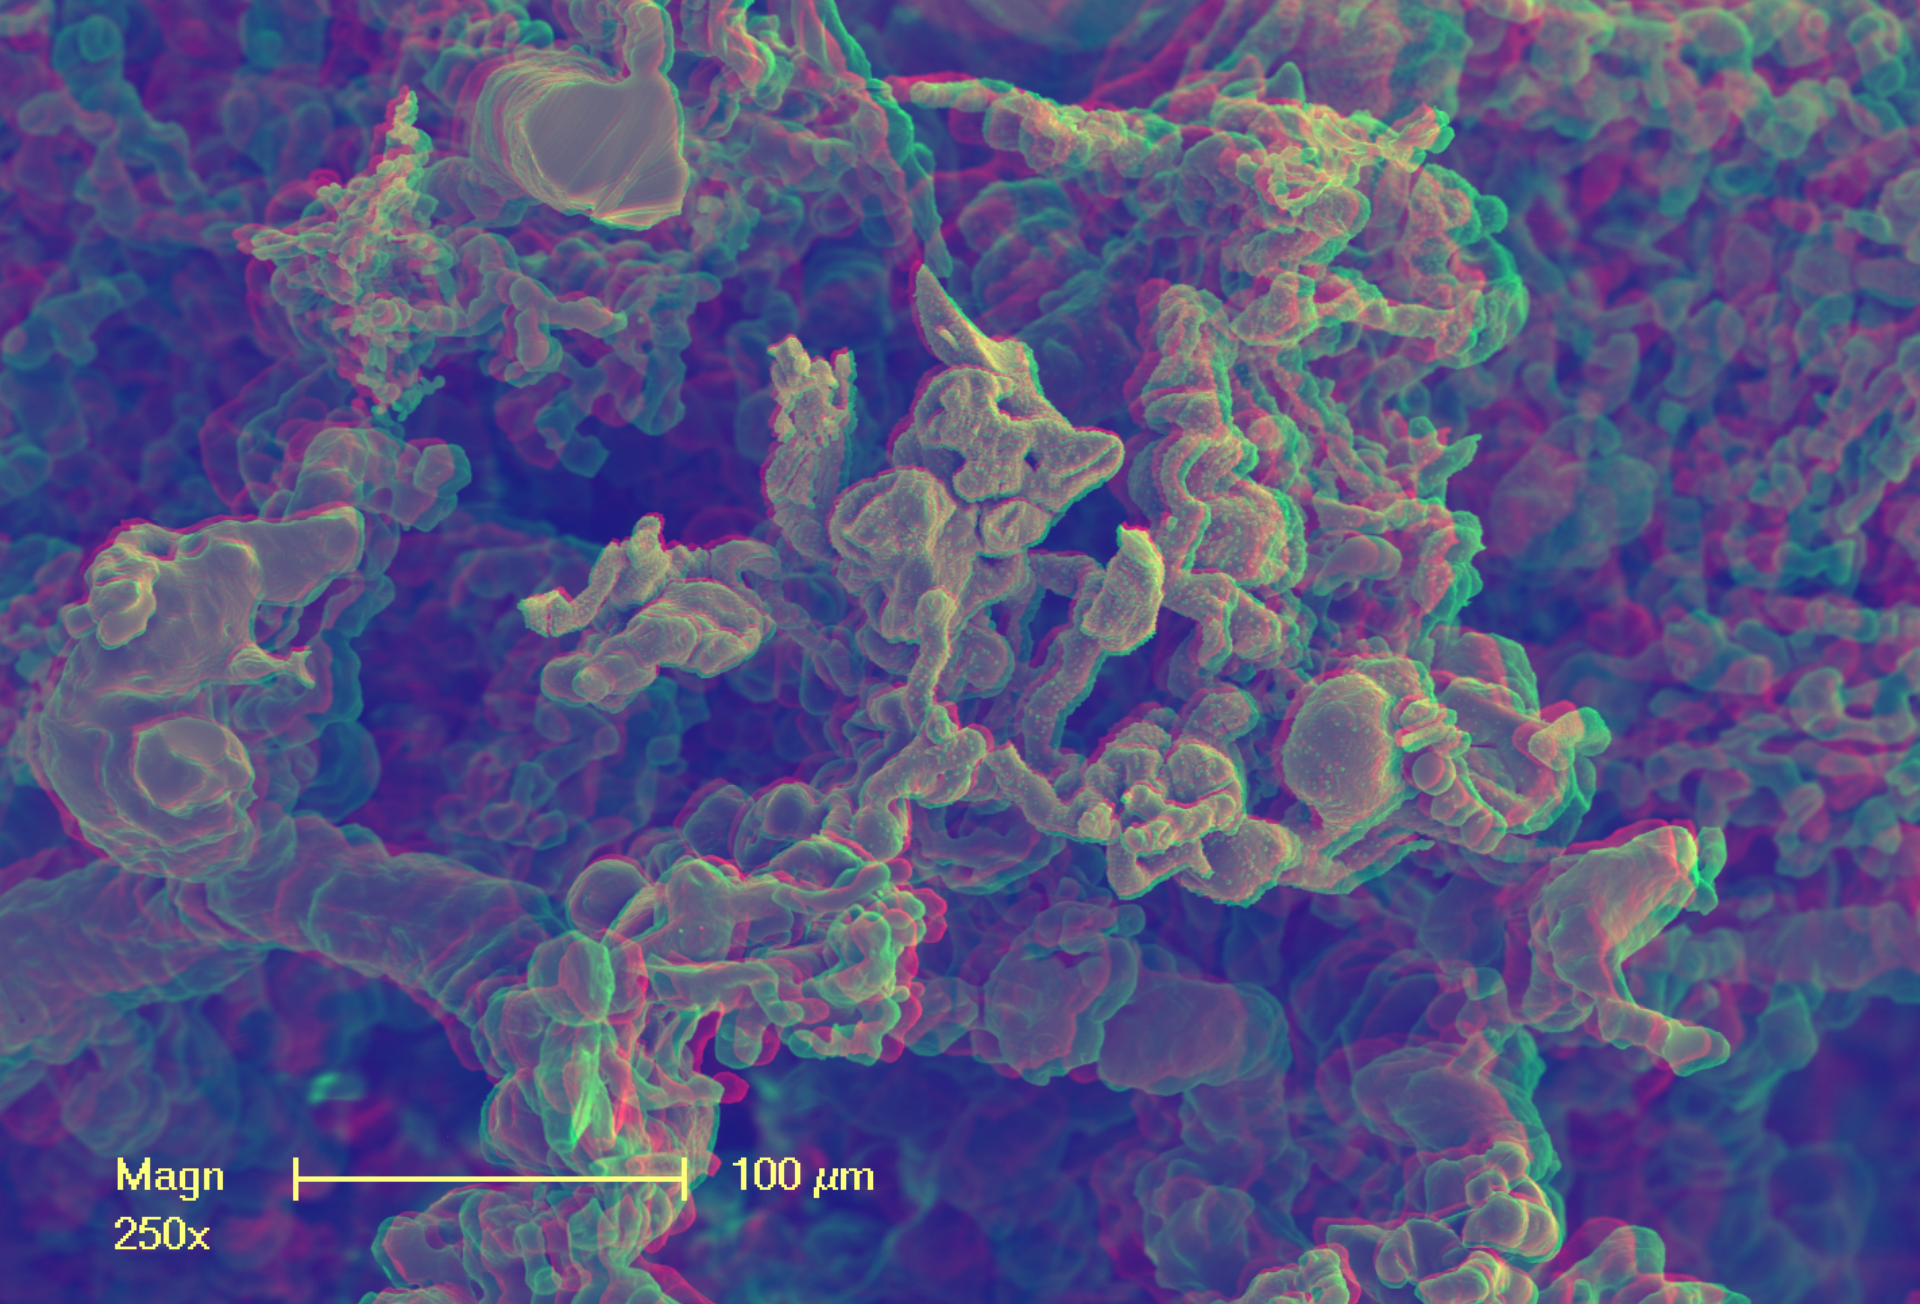

Morphomolecular motifs of bronchopulmonary neoangiogenesis in interstitial lung diseases (ILDs) by Ackermann *et al.*

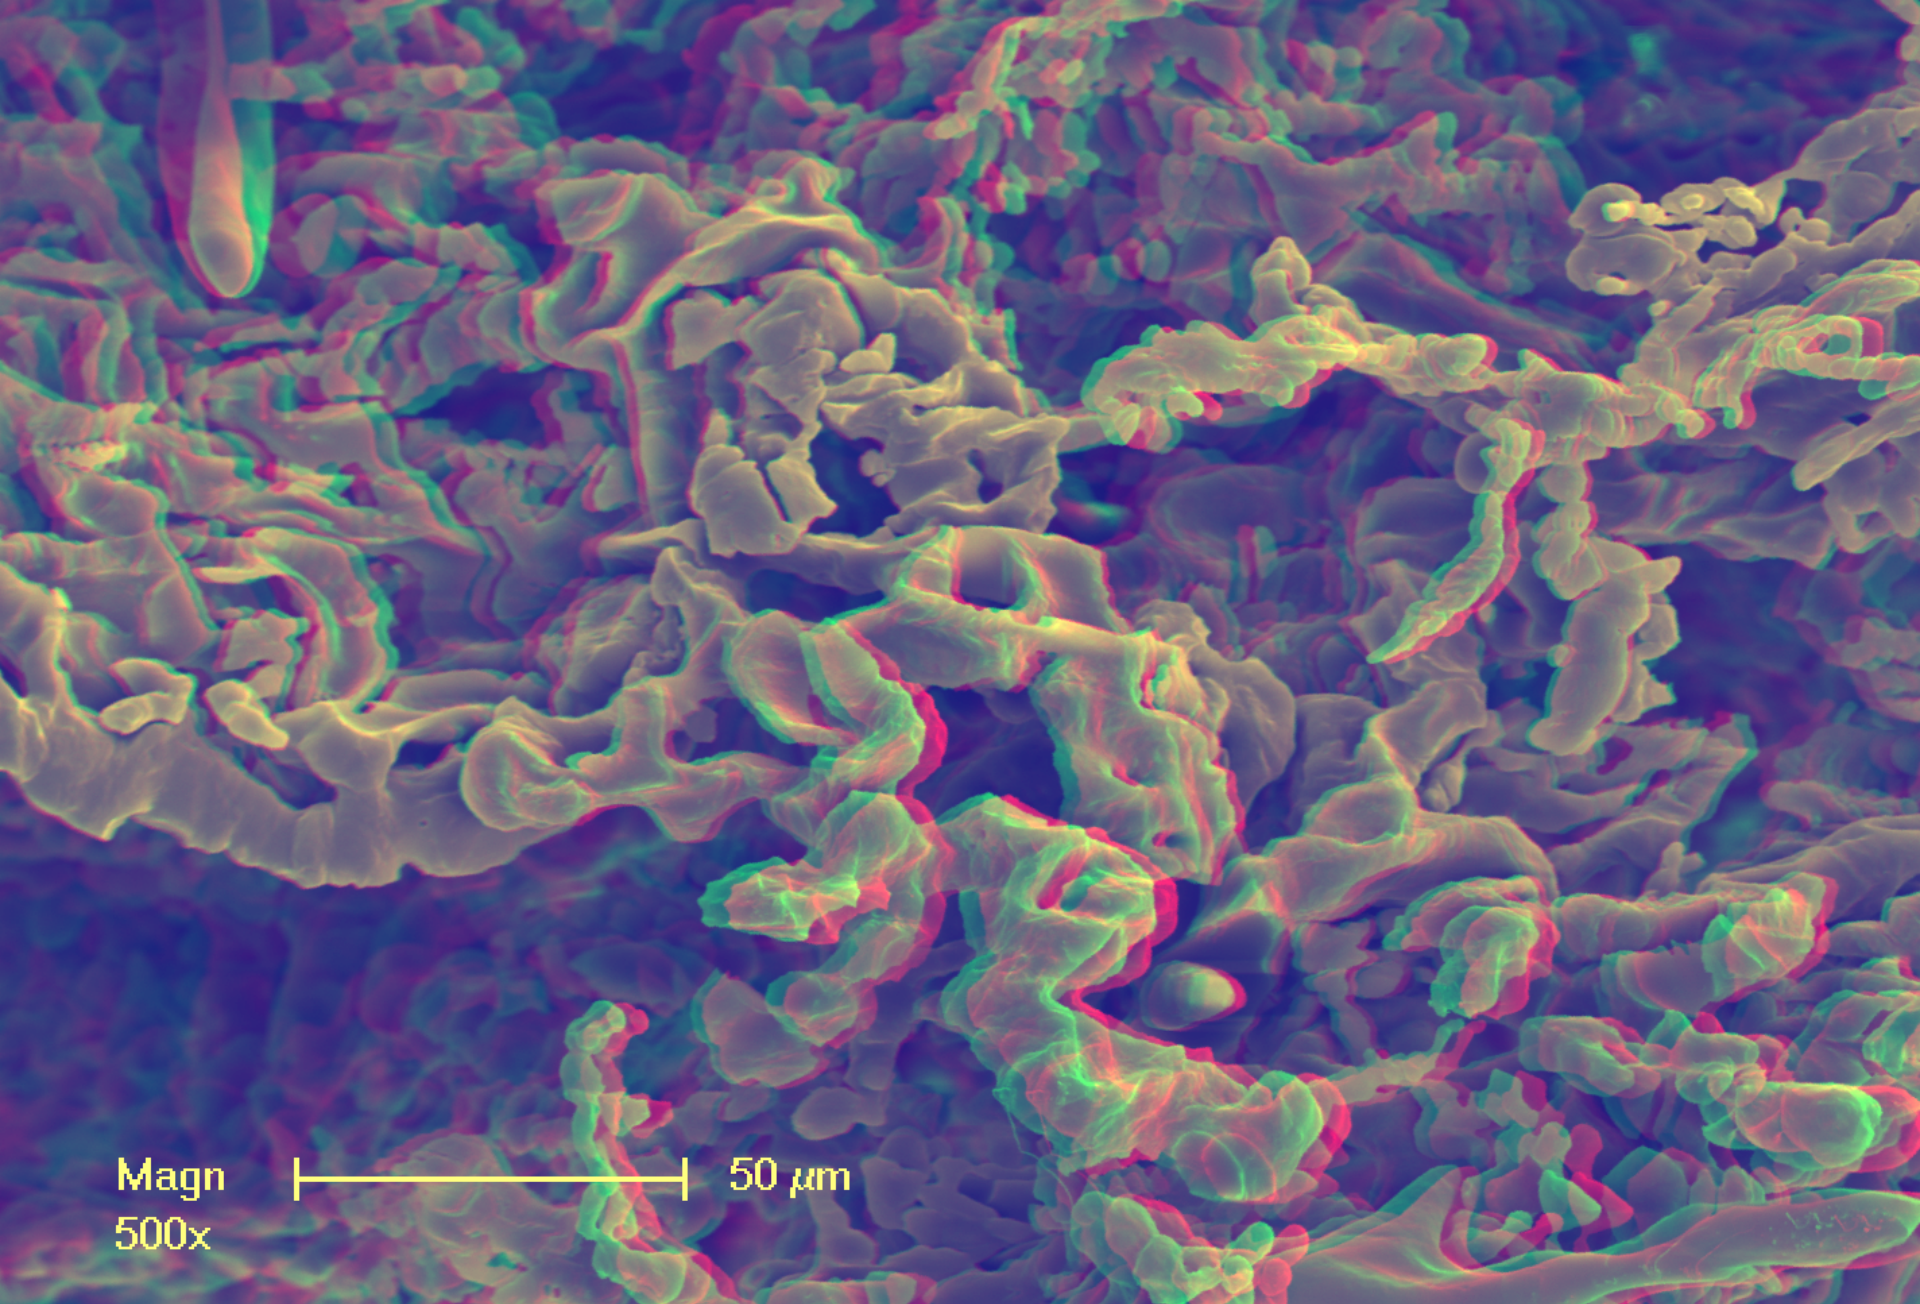

Morphomolecular motifs of bronchopulmonary neoangiogenesis in interstitial lung diseases (ILDs) by Ackermann *et al.*

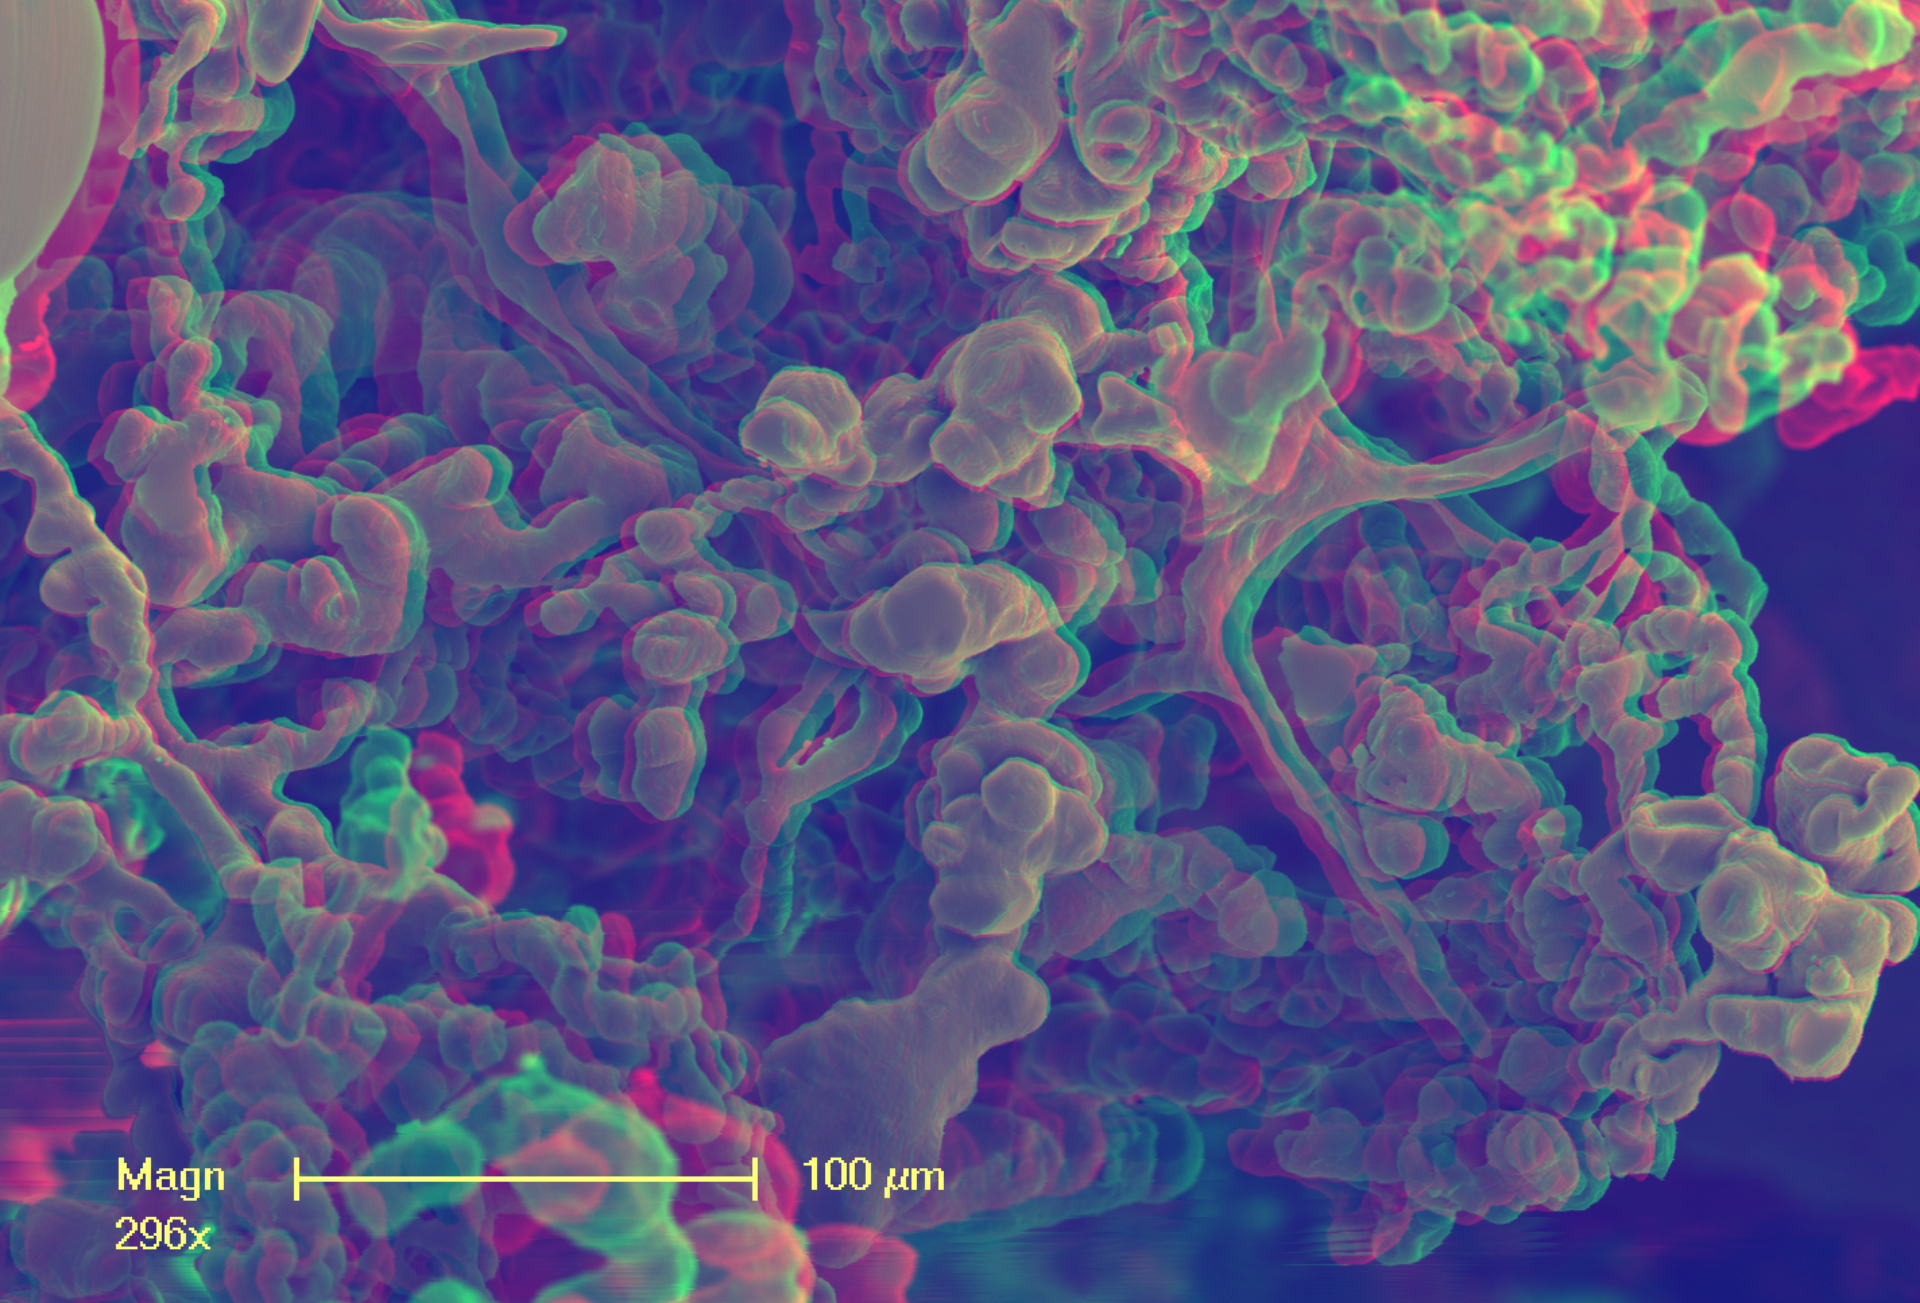

Magn  
296x

100  $\mu\text{m}$

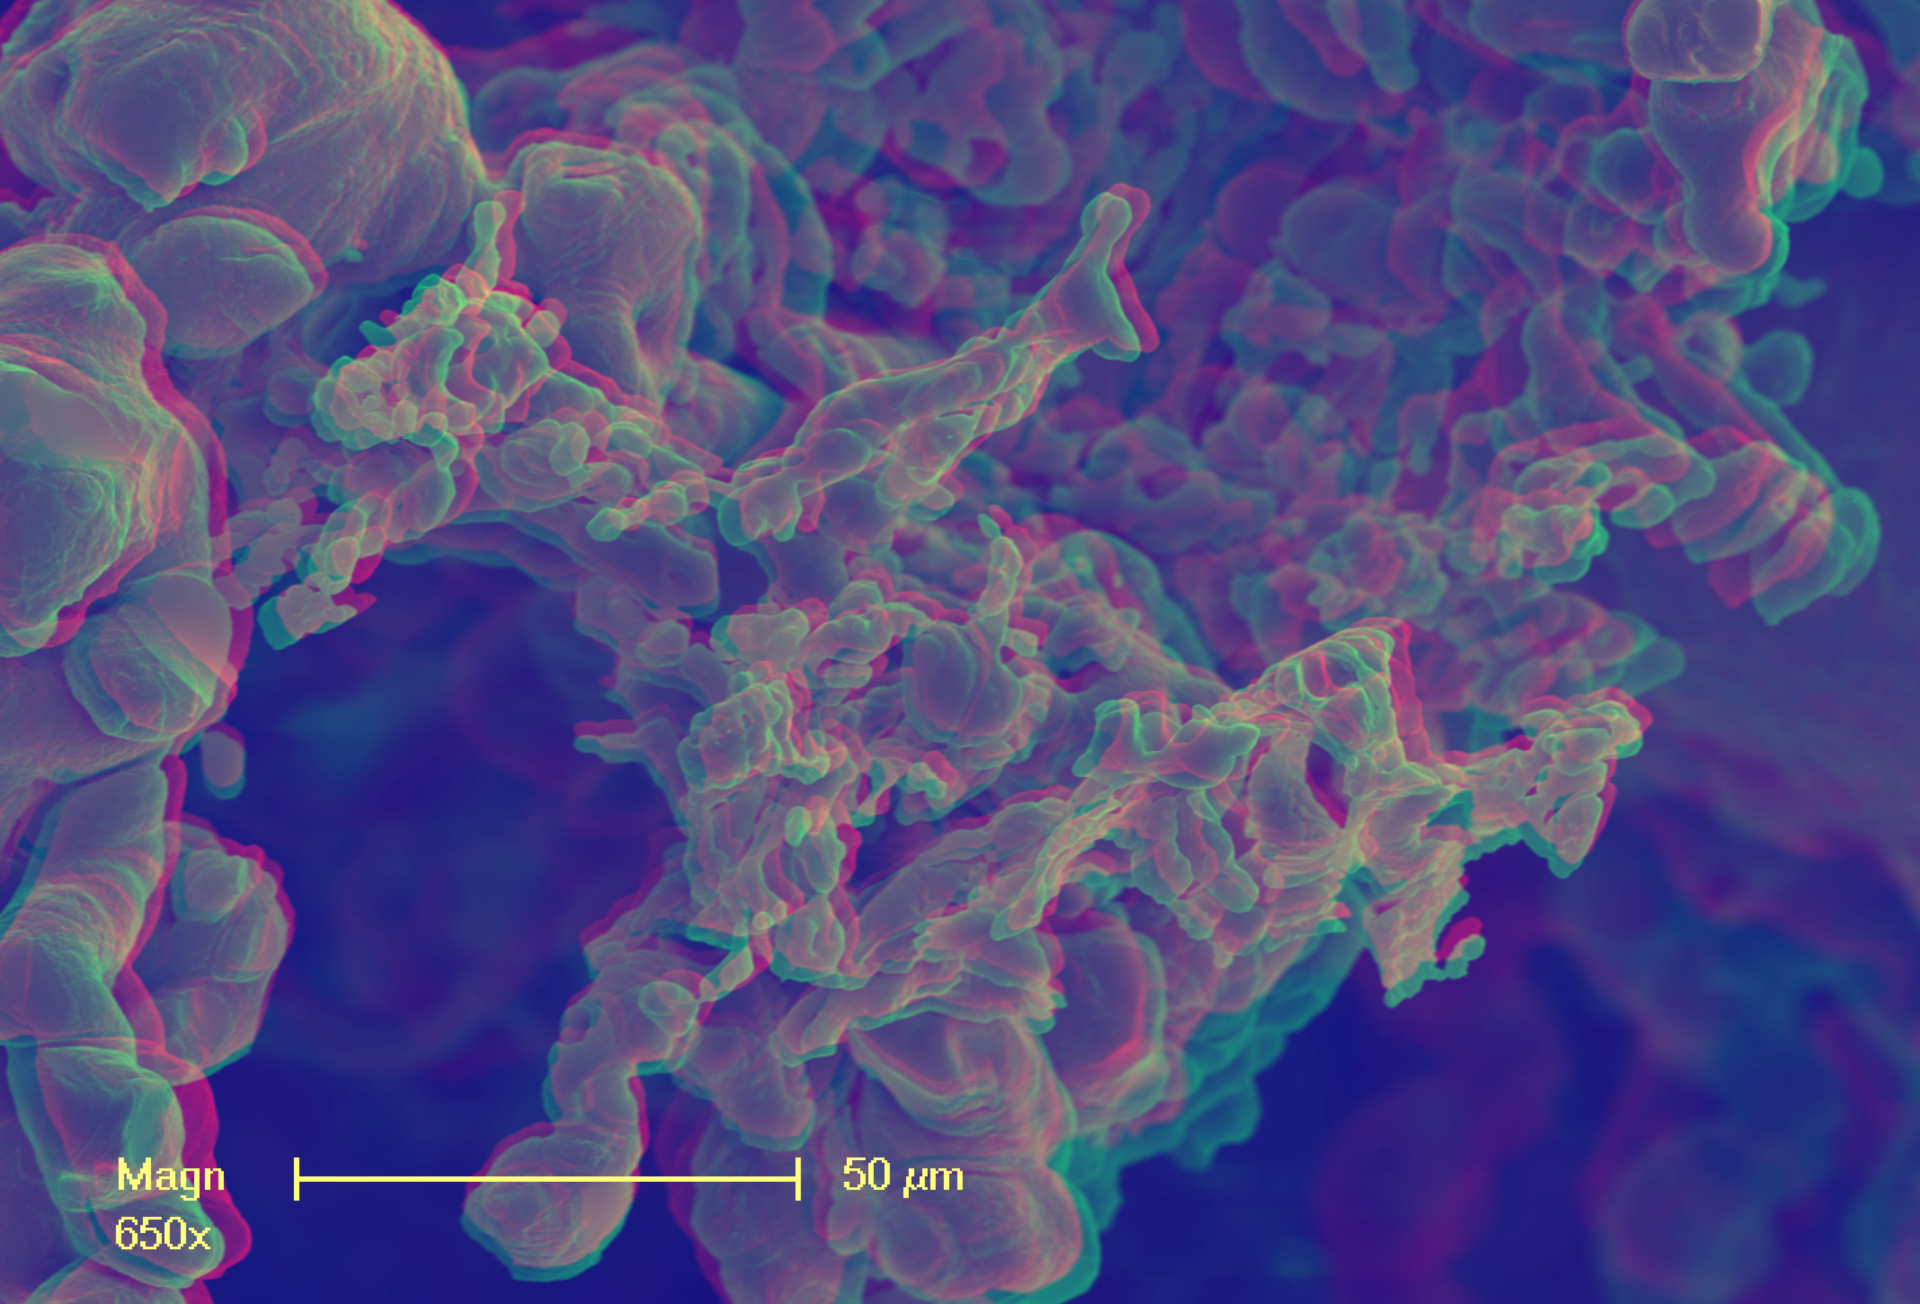

Supplement: inline-supplementary-material-2 [file inline-supplementary-material-2.pdf]
