# Supplementary material
Source: HighWire-hosted journal article supplement (https://erj.ersjournals.com/content/55/3/1900933)

AFE

NSIP

UIP

MMP 2

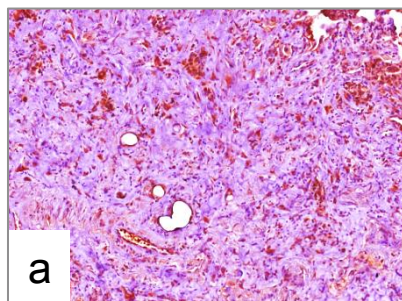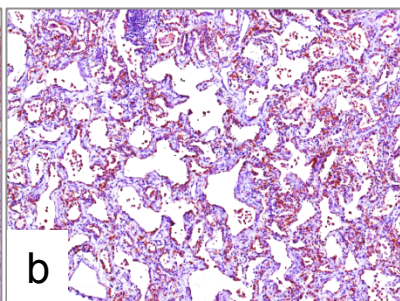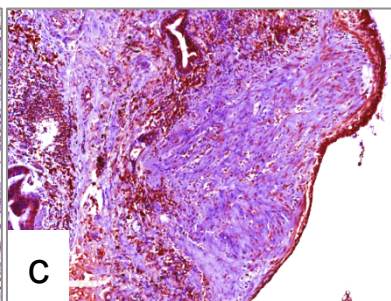

MMP 9

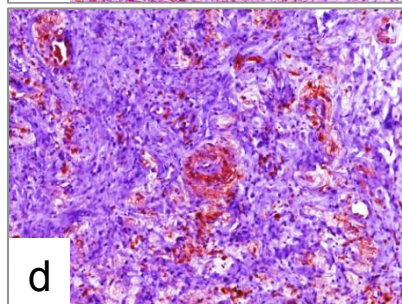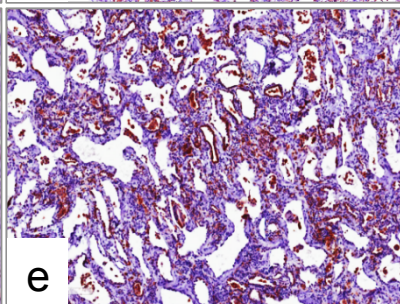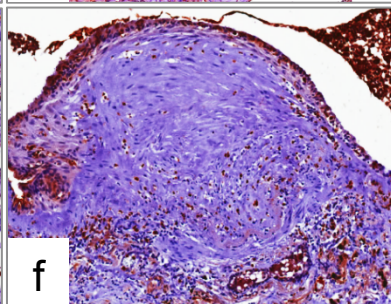

MMP 14

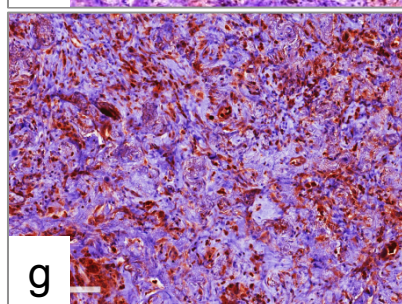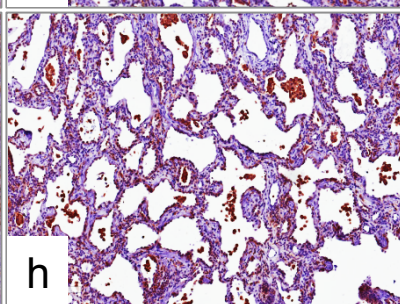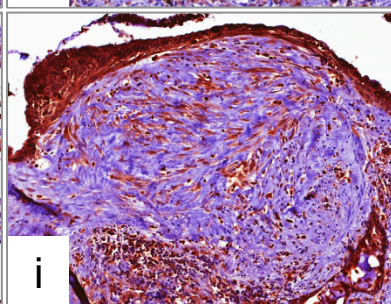

COL I

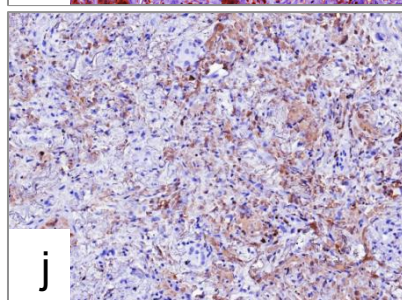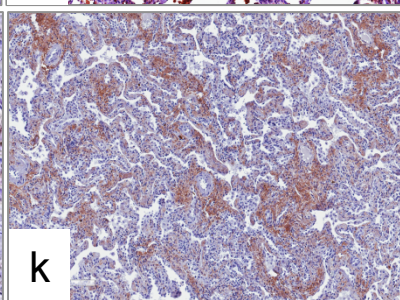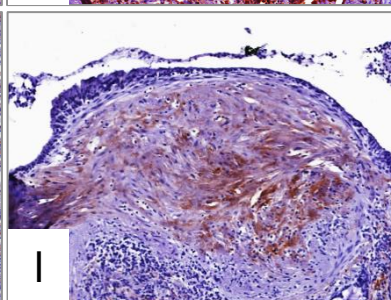

COL III

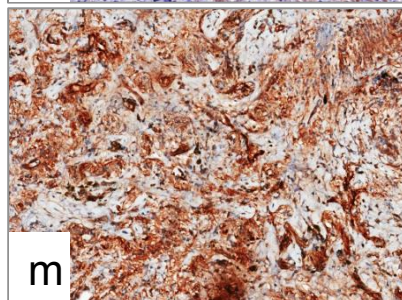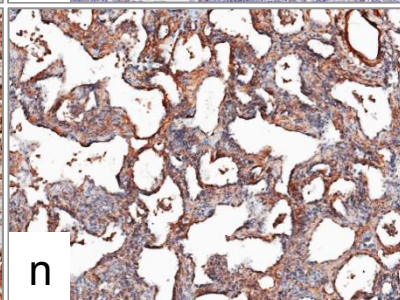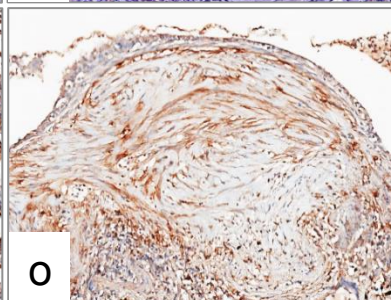

COL IV

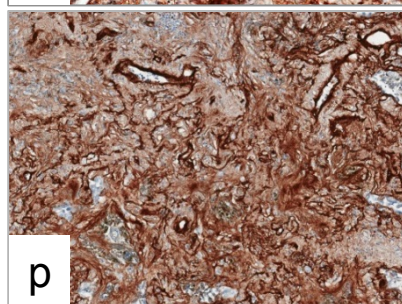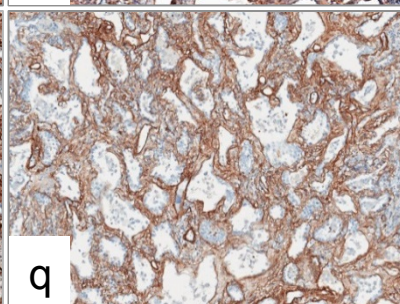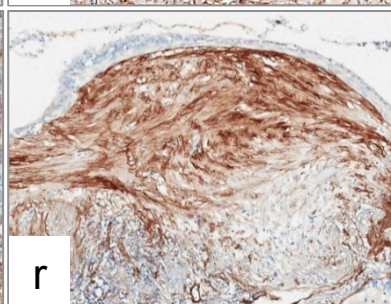

Supplement: inline-supplementary-material-10 [file inline-supplementary-material-10.pdf]
