# Supplementary material
Source: HighWire-hosted journal article supplement (https://erj.ersjournals.com/content/55/3/1900933)

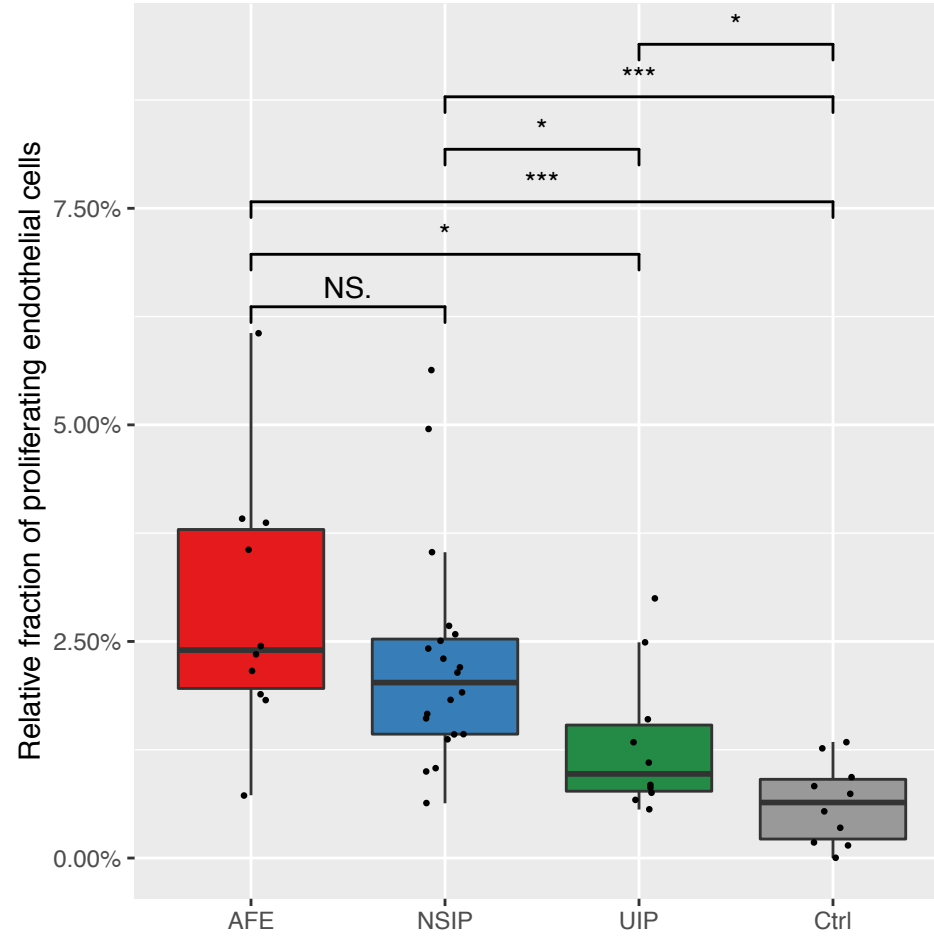

Supplement: inline-supplementary-material-11 [file inline-supplementary-material-11.pdf]
