# Supplementary material
Source: HighWire-hosted journal article supplement (https://erj.ersjournals.com/content/55/3/1900933)
Supplement: inline-supplementary-material-12 [file inline-supplementary-material-12.pdf]

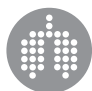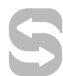

SHAREABLE PDF

# Morphomolecular motifs of pulmonary neoangiogenesis in interstitial lung diseases

Maximilian Ackermann<sup>1,2,10</sup>, Helge Stark<sup>3,10</sup>, Lavinia Neubert<sup>3,4</sup>, Stephanie Schubert<sup>3</sup>, Paul Borchert<sup>3</sup>, Friedemann Linz<sup>1</sup>, Willi L. Wagner<sup>5,6</sup>, Wolfram Stiller<sup>5,6</sup>, Mark Wielpütz<sup>5,6</sup>, Anne Hoefer<sup>3</sup>, Axel Haverich<sup>4,7</sup>, Steven J. Mentzer<sup>8</sup>, Harshit R. Shah<sup>3,4</sup>, Tobias Welte<sup>4,9</sup>, Mark Kuehnel<sup>3,4,10</sup> and Danny Jonigk<sup>3,4,10</sup>

**Affiliations:** <sup>1</sup>Institute of Functional and Clinical Anatomy, University Medical Center of the Johannes Gutenberg-University Mainz, Mainz, Germany. <sup>2</sup>Institute of Pathology, Medical Faculty, Heinrich-Heine-University and University Hospital Düsseldorf, Düsseldorf, Germany. <sup>3</sup>Institute of Pathology, Hannover Medical School, Hannover, Germany. <sup>4</sup>Member of the German Center for Lung Research (DZL), Biomedical Research in Endstage and Obstructive Lung Disease Hannover (BREATH), Hannover, Germany. <sup>5</sup>Dept of Diagnostic and Interventional Radiology, Translational Lung Research Center Heidelberg (TLRC), Heidelberg, Germany. <sup>6</sup>Member of German Center for Lung Research (DZL), University of Heidelberg, Heidelberg, Germany. <sup>7</sup>Dept of Cardiothoracic, Transplantation and Vascular Surgery, Hannover Medical School, Hannover, Germany. <sup>8</sup>Laboratory of Adaptive and Regenerative Biology, Harvard Medical School, Brigham and Women's Hospital, Boston, MA, USA. <sup>9</sup>Clinic of Pneumology, Hannover Medical School, Hannover, Germany. <sup>10</sup>These authors contributed equally and share first and the last authorship, respectively.

**Correspondence:** Maximilian Ackermann, Institute of Functional and Clinical Anatomy, University Medical Center of the Johannes Gutenberg University Mainz, Johann-Joachim-Becher-Weg 13, 55128 Mainz, Germany. E-mail: maximilian.ackermann@uni-mainz.de

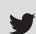

@ERSpublications

**Pulmonary injury patterns are the common denominator in progression of fibrosing lung diseases. This study identified distinct manifestations of neoangiogenesis as drivers of pulmonary remodelling in human ILDs, modulated by bone marrow-derived monocytes.** <http://bit.ly/34F7KNS>

**Cite this article as:** Ackermann M, Stark H, Neubert L, *et al.* Morphomolecular motifs of pulmonary neoangiogenesis in interstitial lung diseases. *Eur Respir J* 2020; 55: 1900933 [<https://doi.org/10.1183/13993003.00933-2019>].

This single-page version can be shared freely online.

**ABSTRACT** The pathogenetic role of angiogenesis in interstitial lung diseases (ILDs) is controversial. This study represents the first investigation of the spatial complexity and molecular motifs of microvascular architecture in important subsets of human ILD. The aim of our study was to identify specific variants of neoangiogenesis in three common pulmonary injury patterns in human ILD.

We performed comprehensive and compartment-specific analysis of 24 human lung explants with usual interstitial pneumonia (UIP), nonspecific interstitial pneumonia (NSIP) and alveolar fibroelastosis (AFE) using histopathology, microvascular corrosion casting, micro-computed tomography based volumetry and gene expression analysis using Nanostring as well as immunohistochemistry to assess remodelling-associated angiogenesis.

Morphometrical assessment of vessel diameters and intervacular distances showed significant differences in neoangiogenesis in characteristically remodelled areas of UIP, NSIP and AFE lungs. Likewise, gene expression analysis revealed distinct and specific angiogenic profiles in UIP, NSIP and AFE lungs.

Whereas UIP lungs showed a higher density of upstream vascularity and lower density in perifocal blood vessels, NSIP and AFE lungs revealed densely packed alveolar septal blood vessels. Vascular remodelling in NSIP and AFE is characterised by a prominent intussusceptive neoangiogenesis, in contrast to UIP, in which sprouting of new vessels into the fibrotic areas is characteristic. The molecular analyses of the gene expression provide a foundation for understanding these fundamental differences between AFE and UIP and give insight into the cellular functions involved.
